# Supplementary material for: Trifluoroacetic acid-mediated synthesis of xanthene constructs and their extensive anti-tuberculosis evaluation
Source: Royal Society of Chemistry journal article supplement (doi:10.1039/d3md00518f), 2024-01-01
Supplement: d3md00518f1.pdf [file d3md00518f1.pdf]

# Trifluoroacetic Acid-mediated Synthesis of Xanthene Constructs and their Extensive Anti-tuberculosis Evaluation

Bisma Teli,<sup>a,b#</sup> Mohamad Mosa Mubarak,<sup>b,c#</sup> Zahoor Ahmad,<sup>b,c\*</sup> Bilal A. Bhat <sup>a,b\*</sup>

<sup>a</sup>*Natural Products and Medicinal Chemistry, CSIR-IIIM, Sanatnagar, Srinagar, 190005, India*

<sup>b</sup>*Academy of Scientific and Innovative Research (AcSIR), Ghaziabad 201002, India.*

<sup>c</sup>*Clinical Microbiology and PK/PD Division, CSIR-IIIM, Sanatnagar, Srinagar, 190005, India*

<sup>#</sup> *Equal Contribution.*

\* Corresponding authors.

E-mail address: [zahoorap@iiim.res.in](mailto:zahoorap@iiim.res.in) (Zahoor Ahmad), [bilal@iiim.res.in](mailto:bilal@iiim.res.in) (Bilal A. Bhat)

## Supporting Information

# <sup>1</sup>H and <sup>13</sup>C NMR of compound 13a

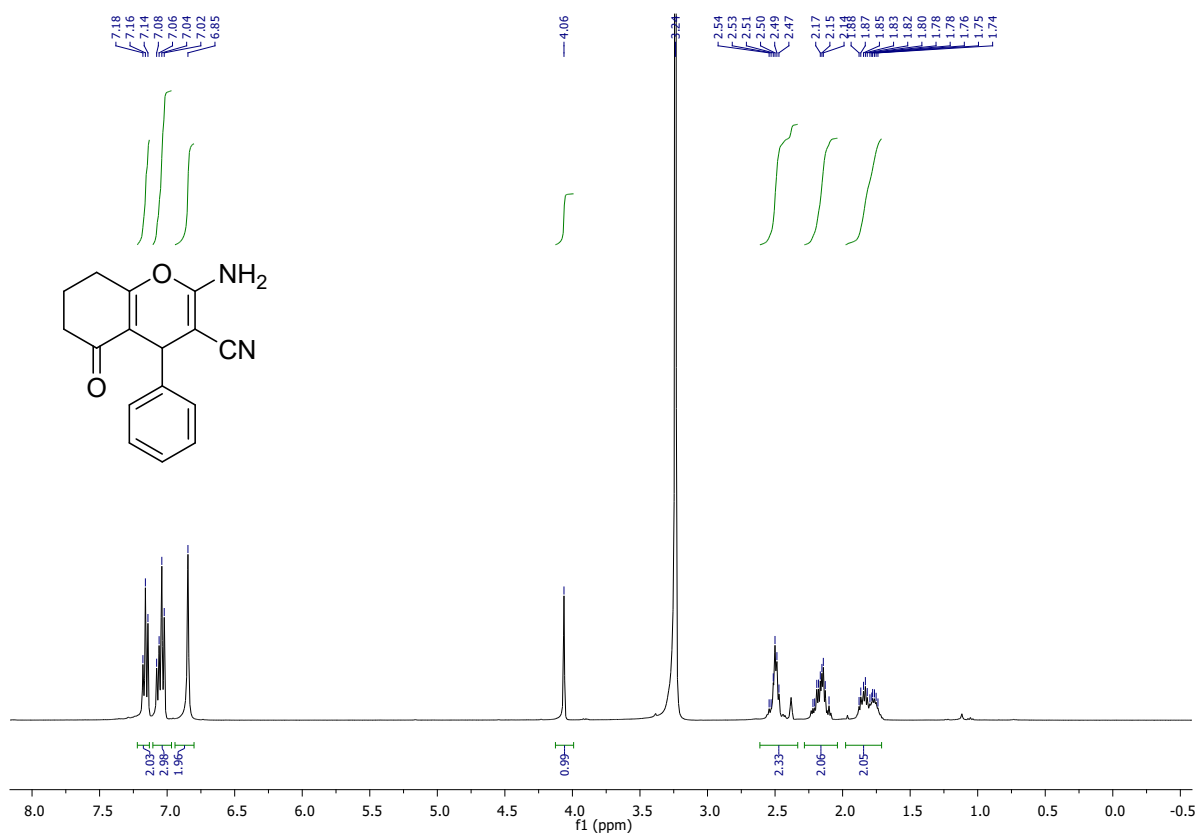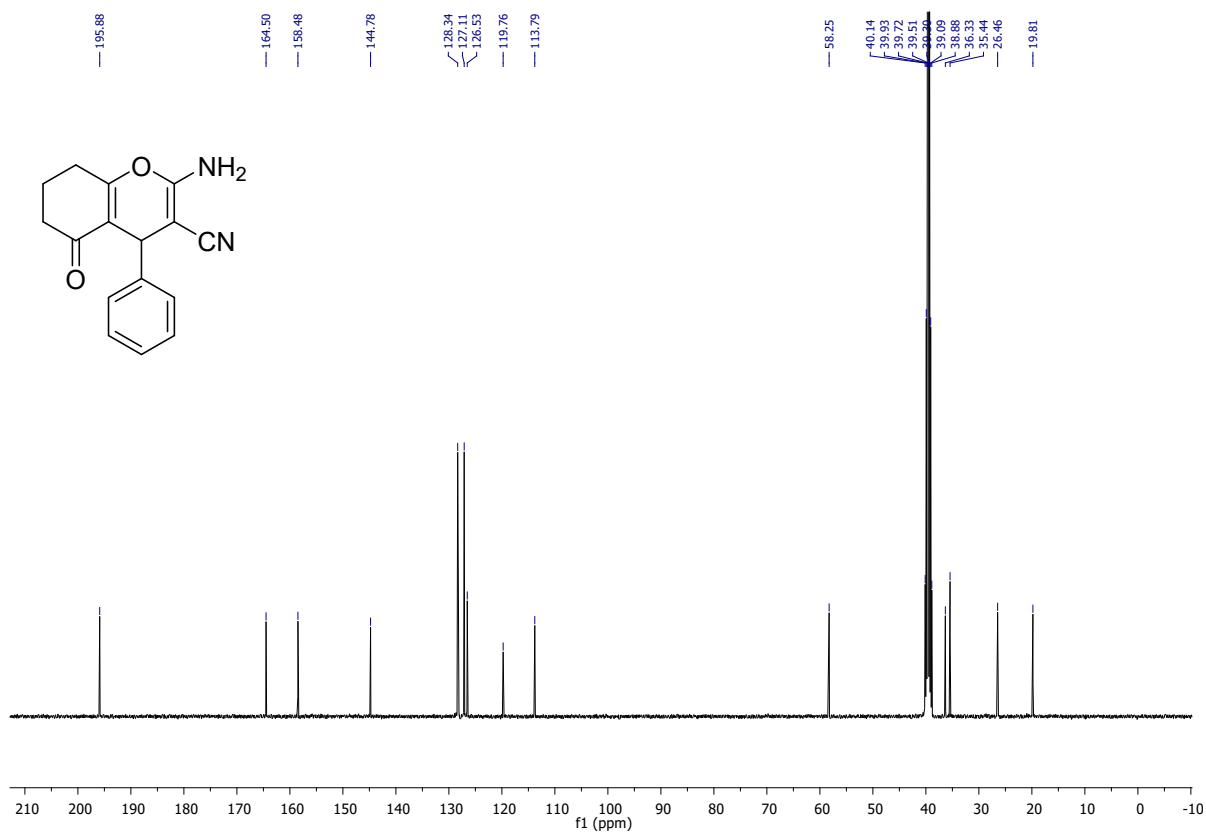

# <sup>1</sup>H and <sup>13</sup>C NMR of compound 13b

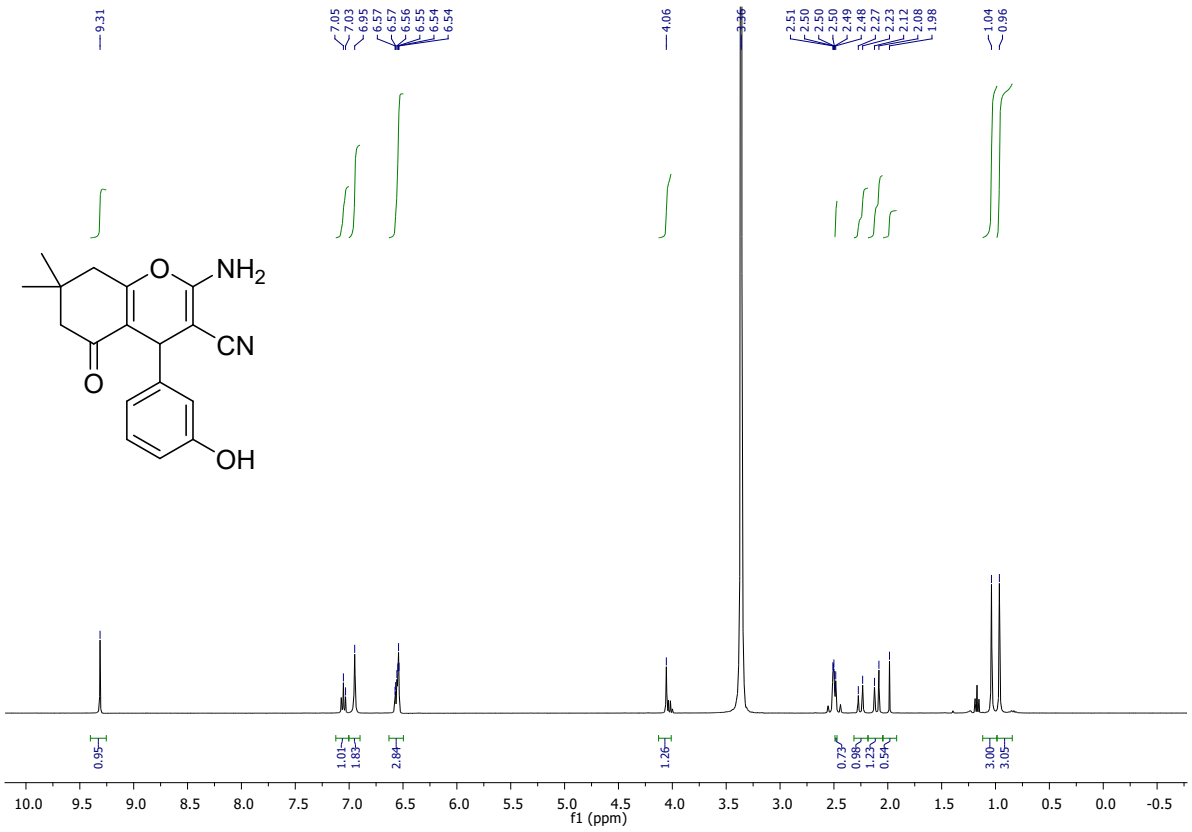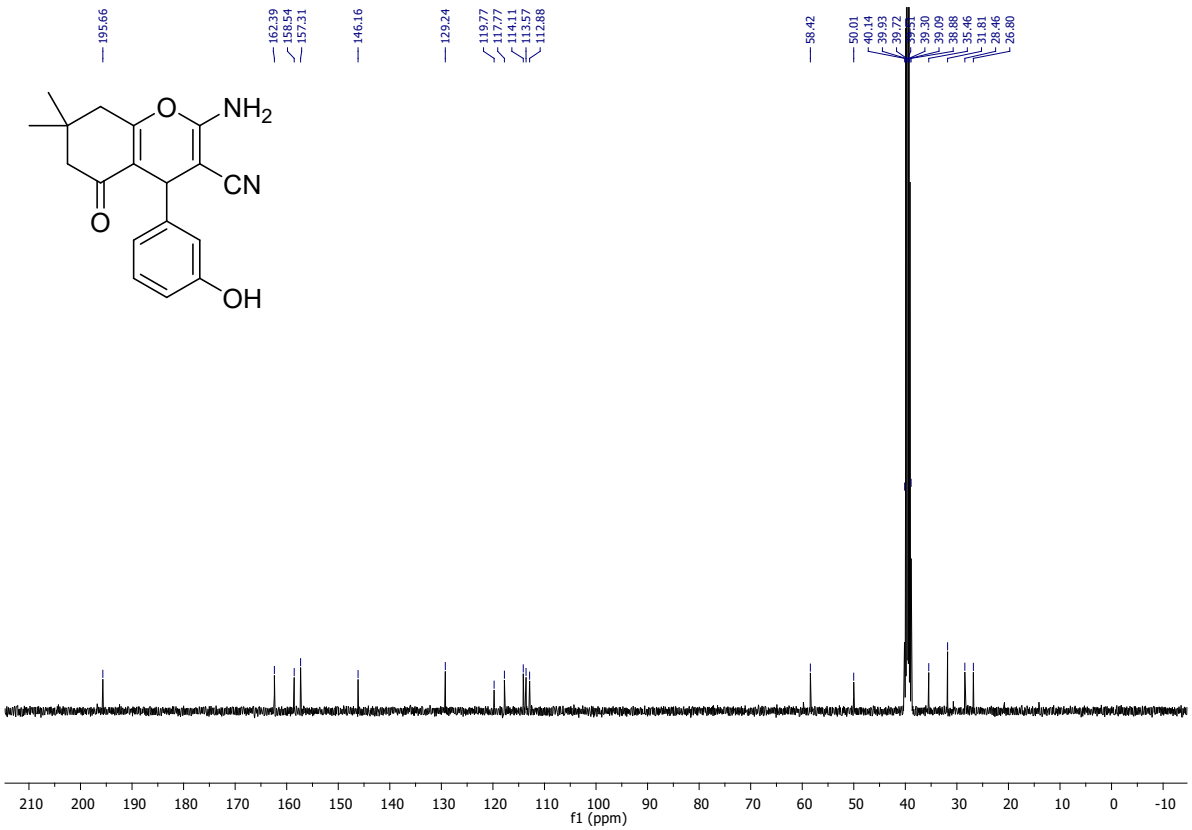

# <sup>1</sup>H and <sup>13</sup>C NMR of compound 13c

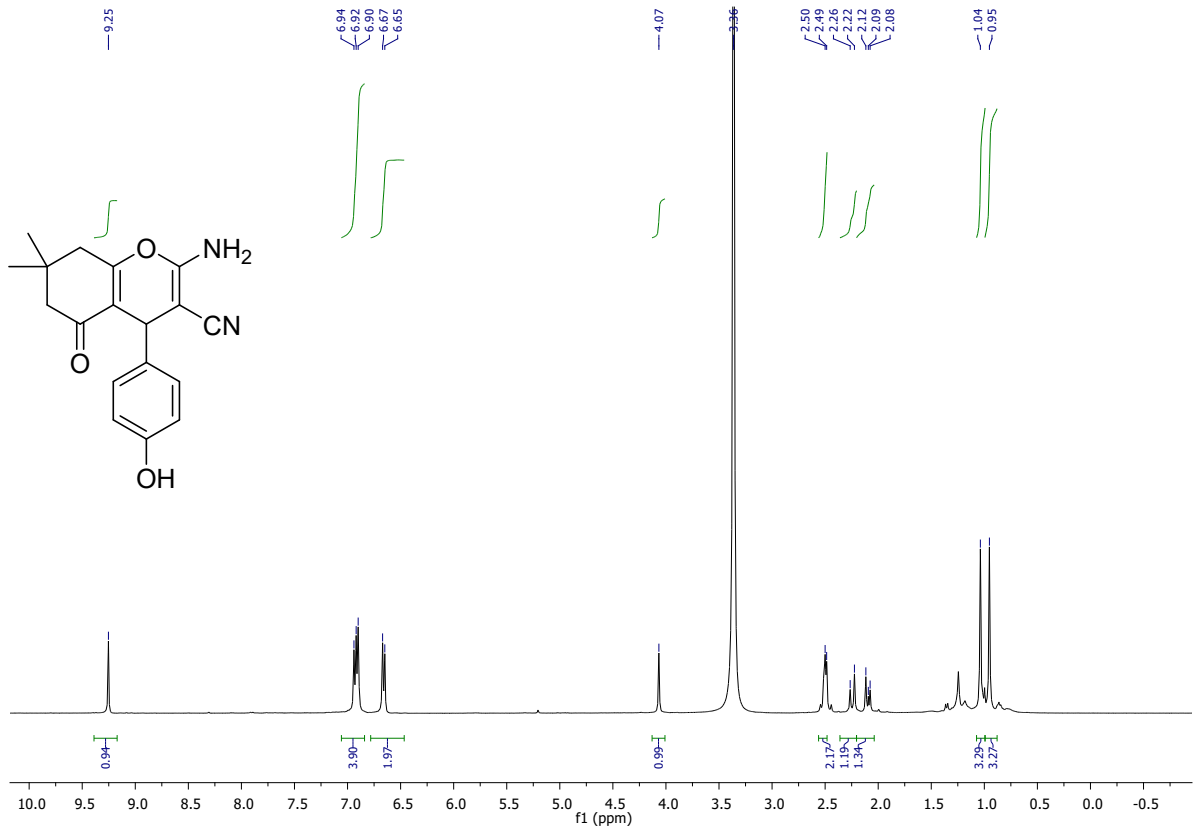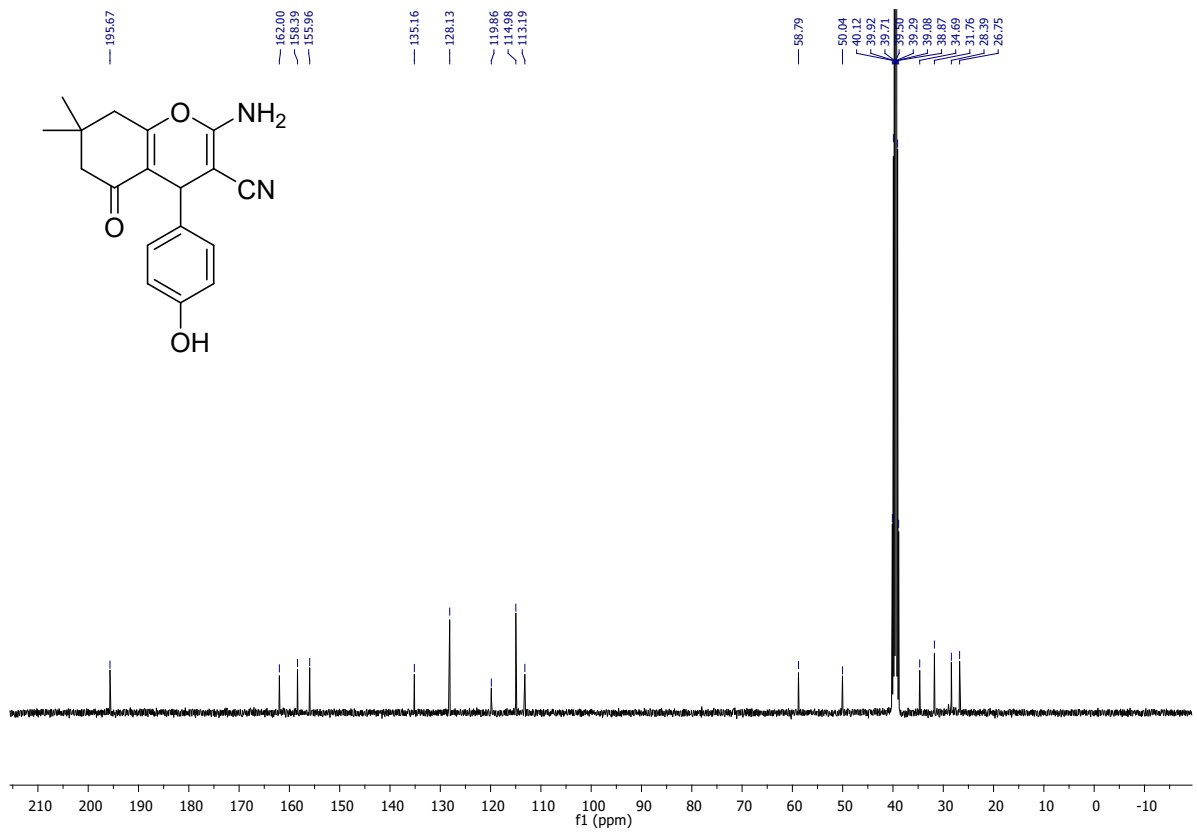

# <sup>1</sup>H and <sup>13</sup>C NMR of compound 13d

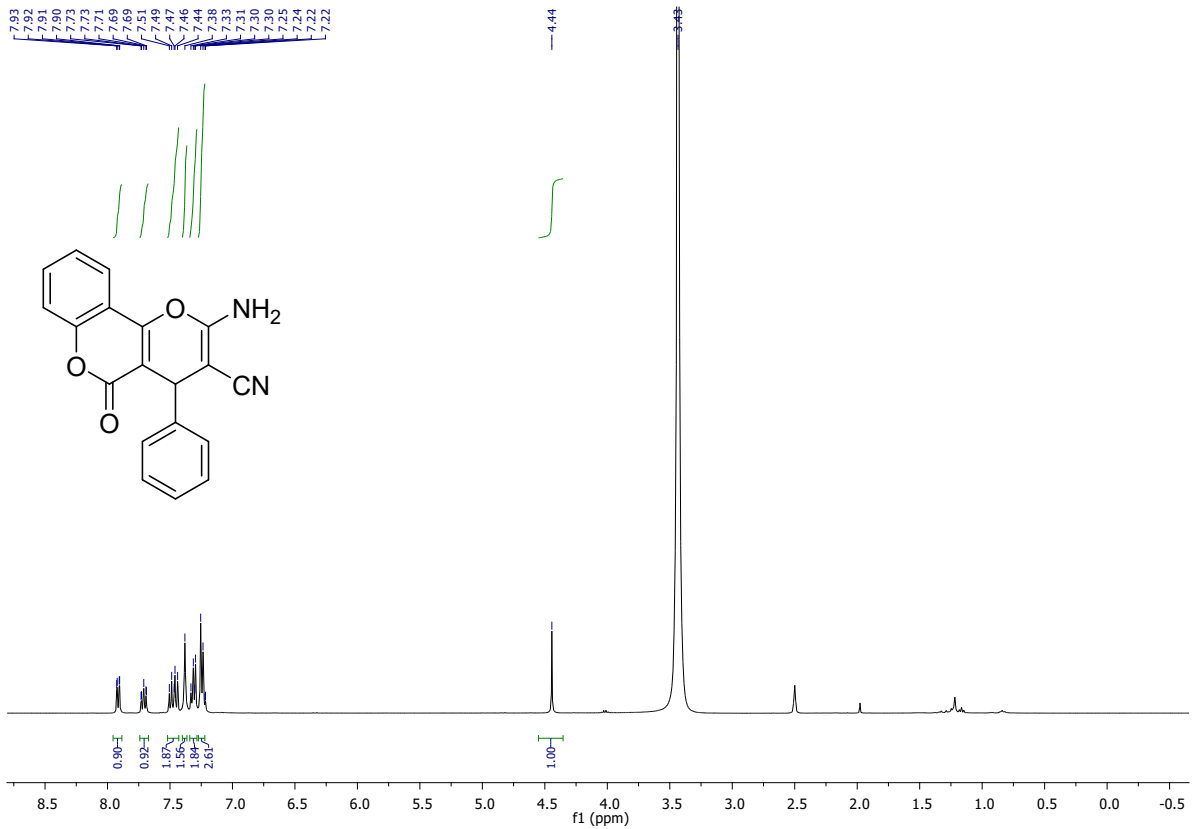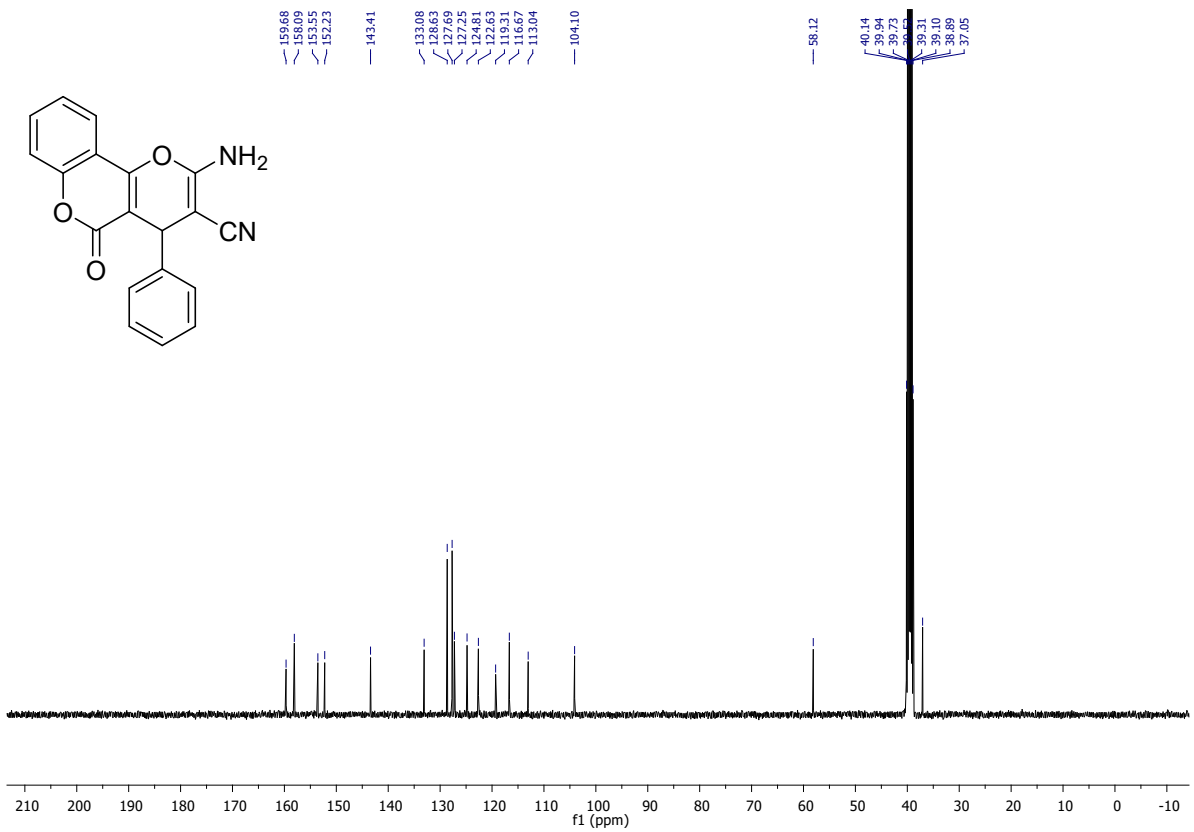

# $^1\text{H}$ and $^{13}\text{C}$ NMR of compound 14a

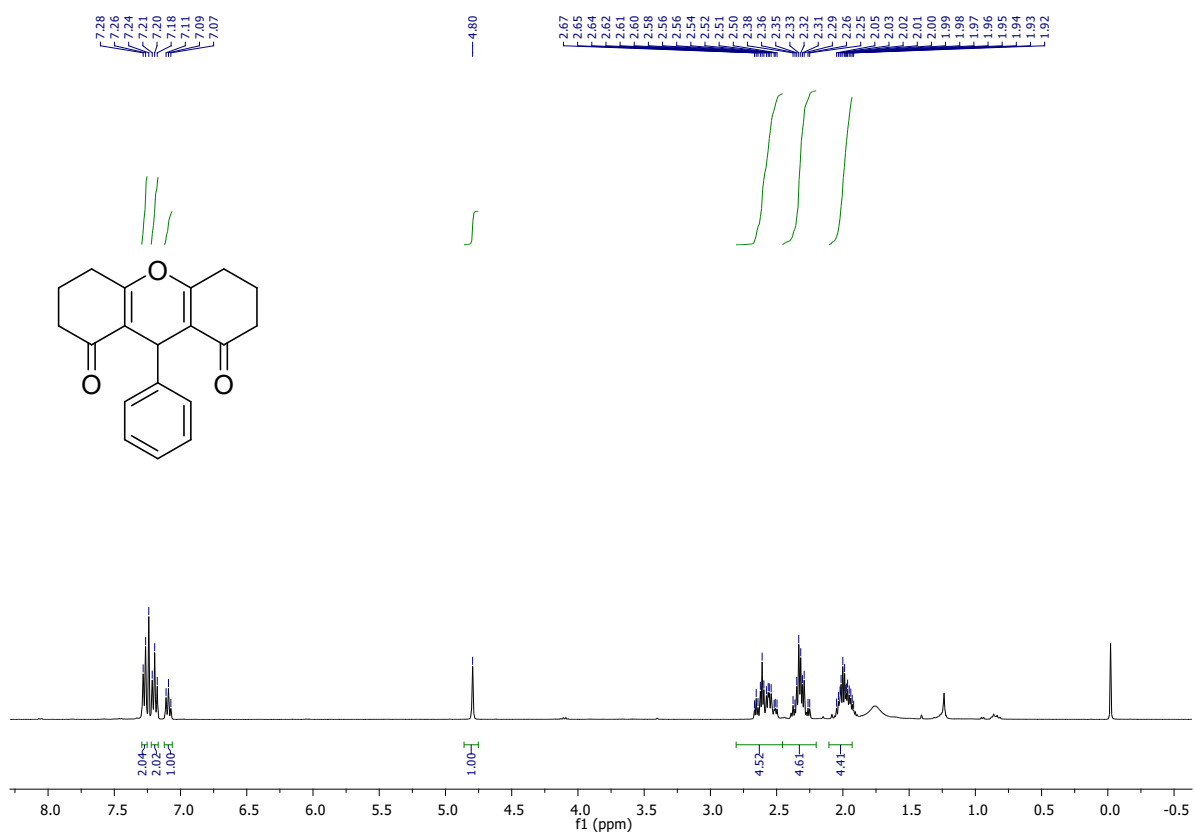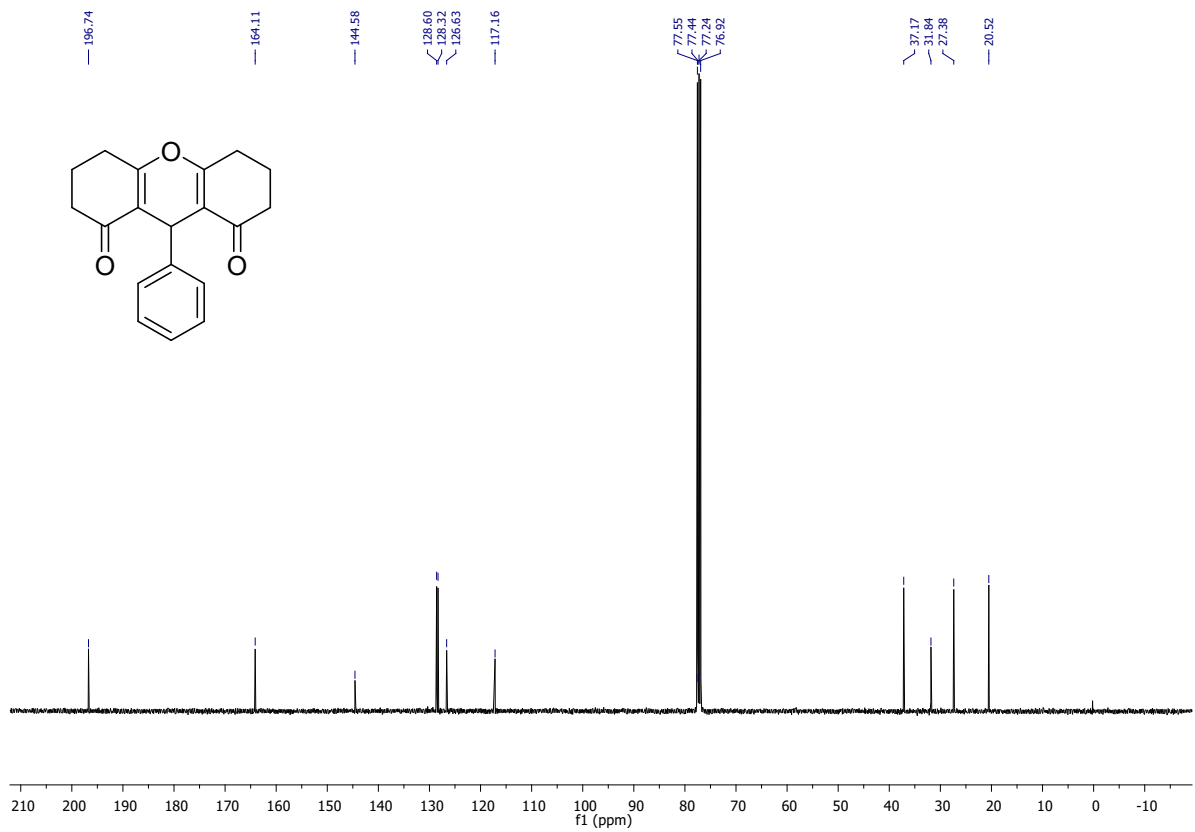

# <sup>1</sup>H and <sup>13</sup>C NMR of compound 14b

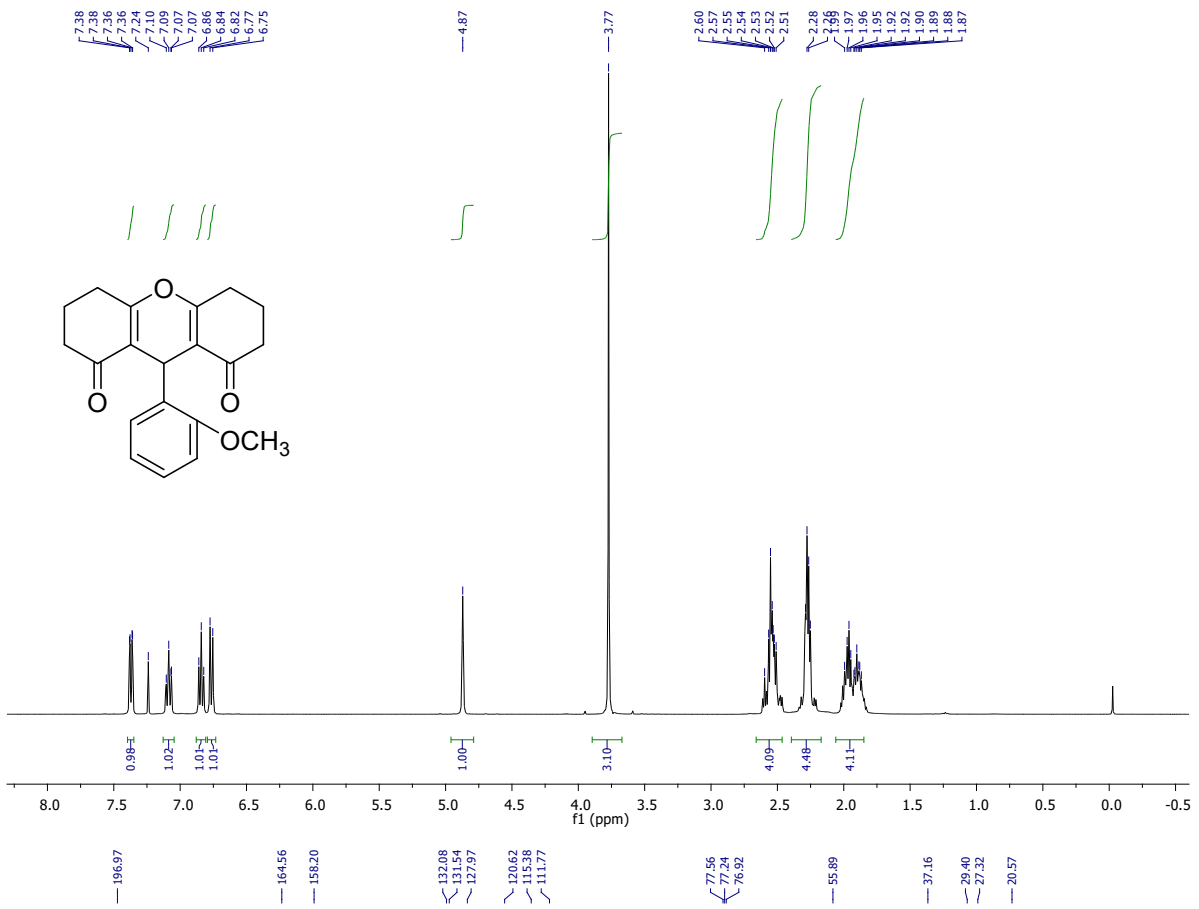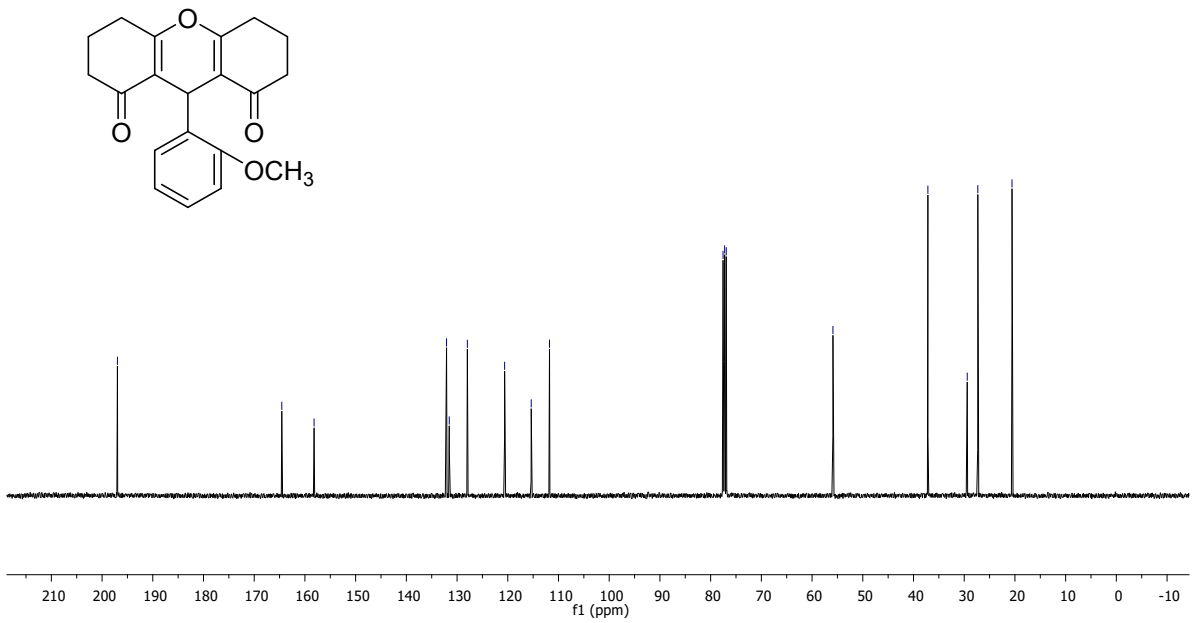

# <sup>1</sup>H and <sup>13</sup>C NMR of compound 14c

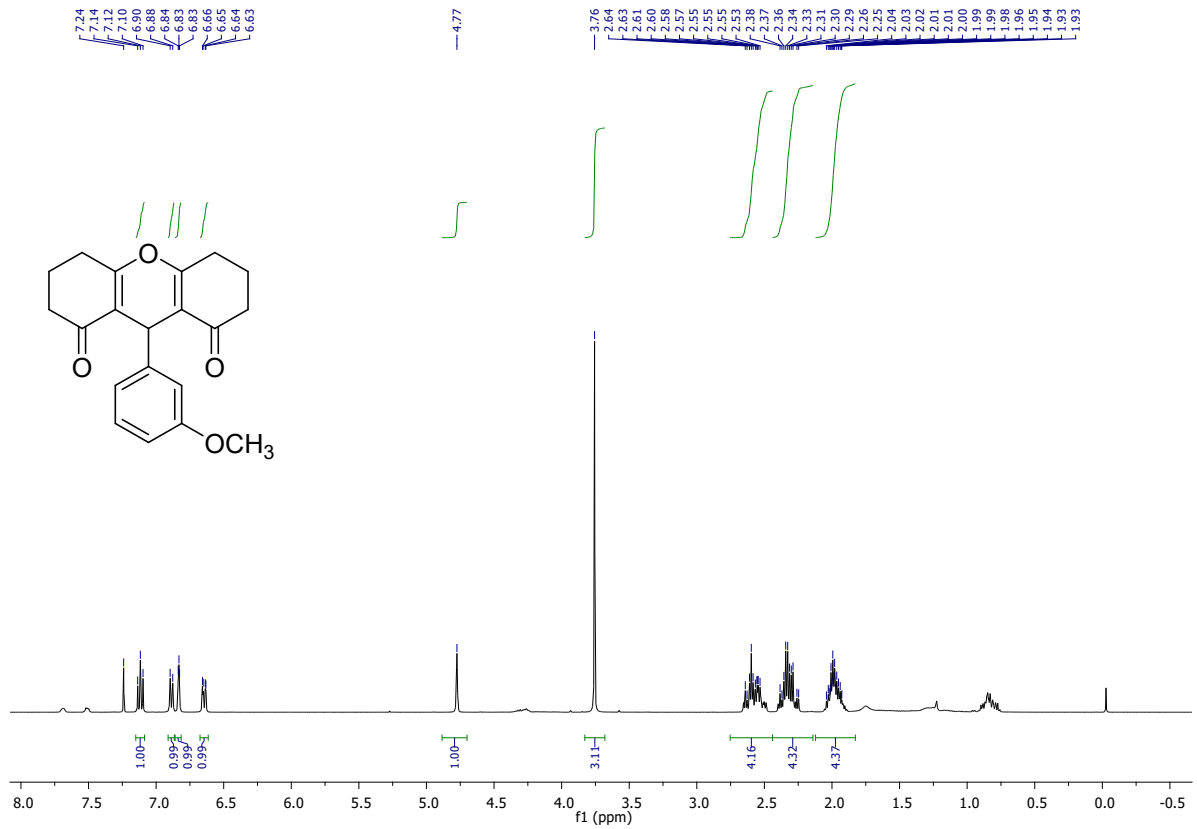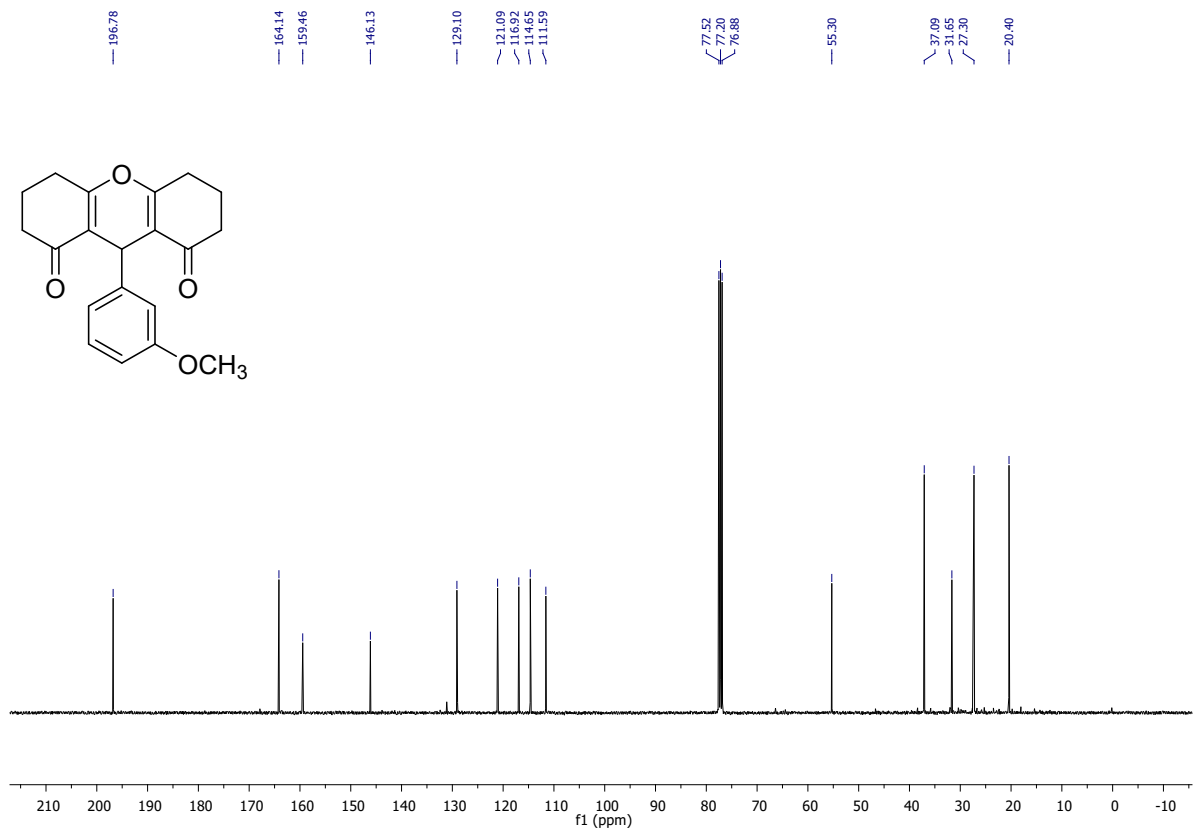



# <sup>1</sup>H and <sup>13</sup>C NMR of compound 14d

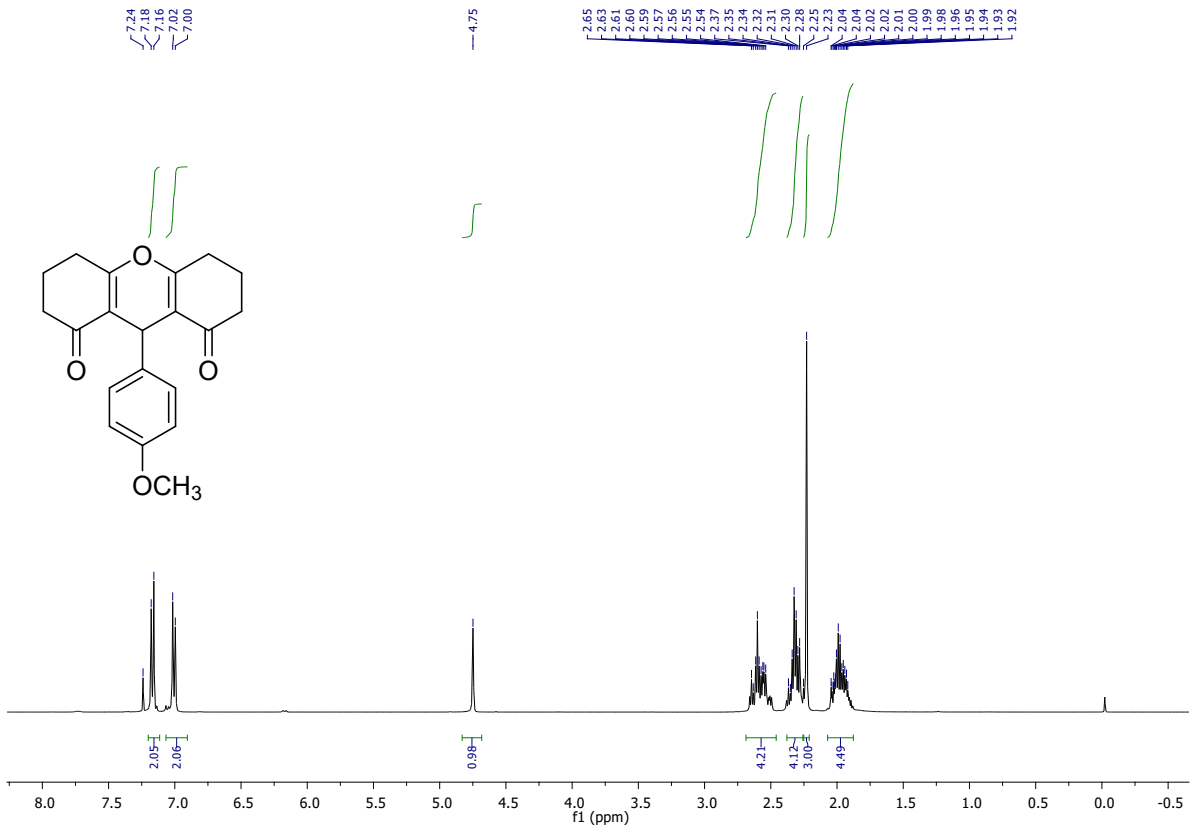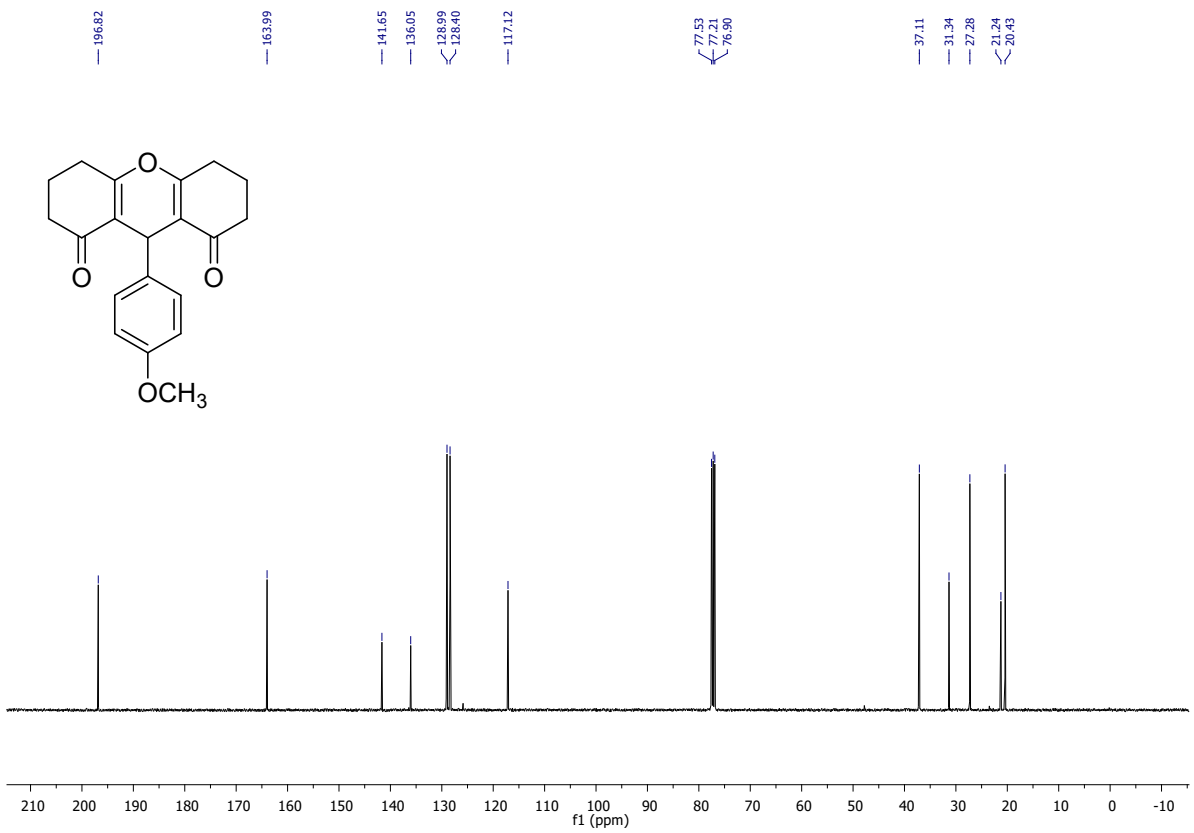

# <sup>1</sup>H and <sup>13</sup>C NMR of compound 14e

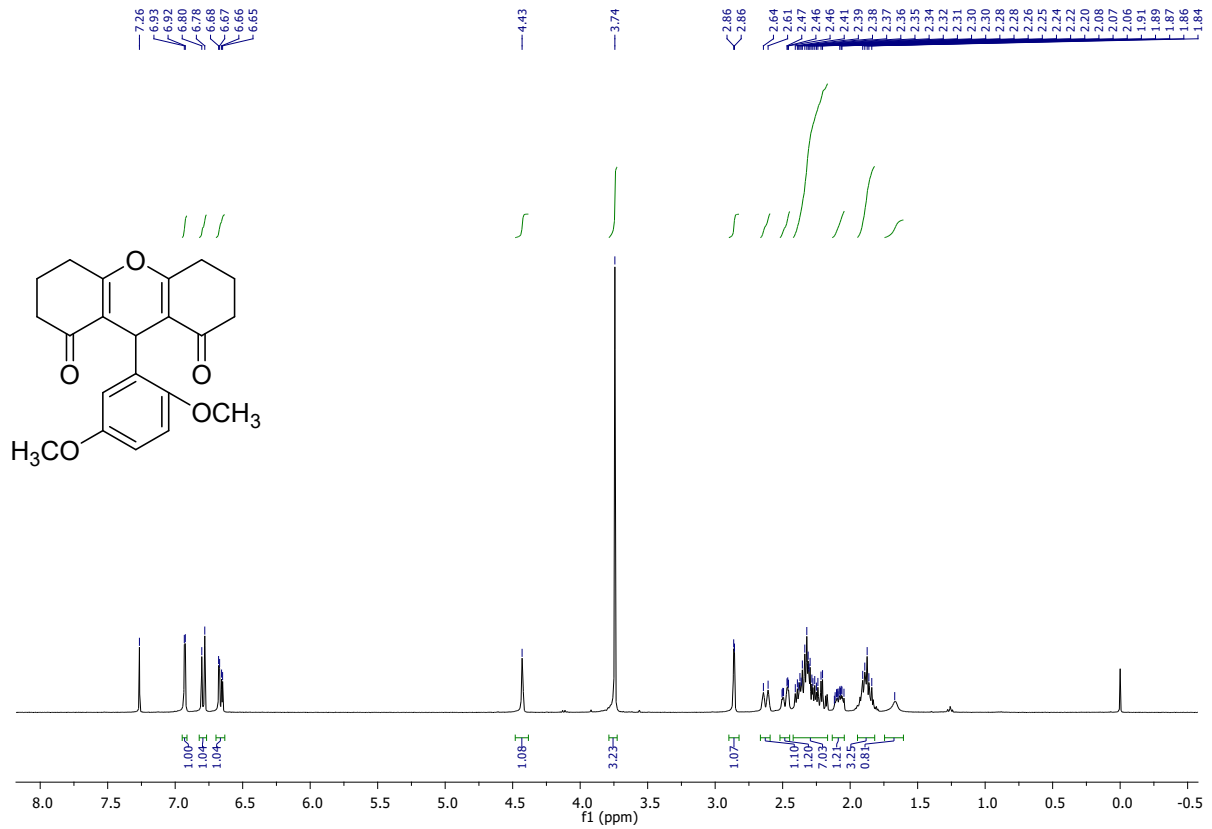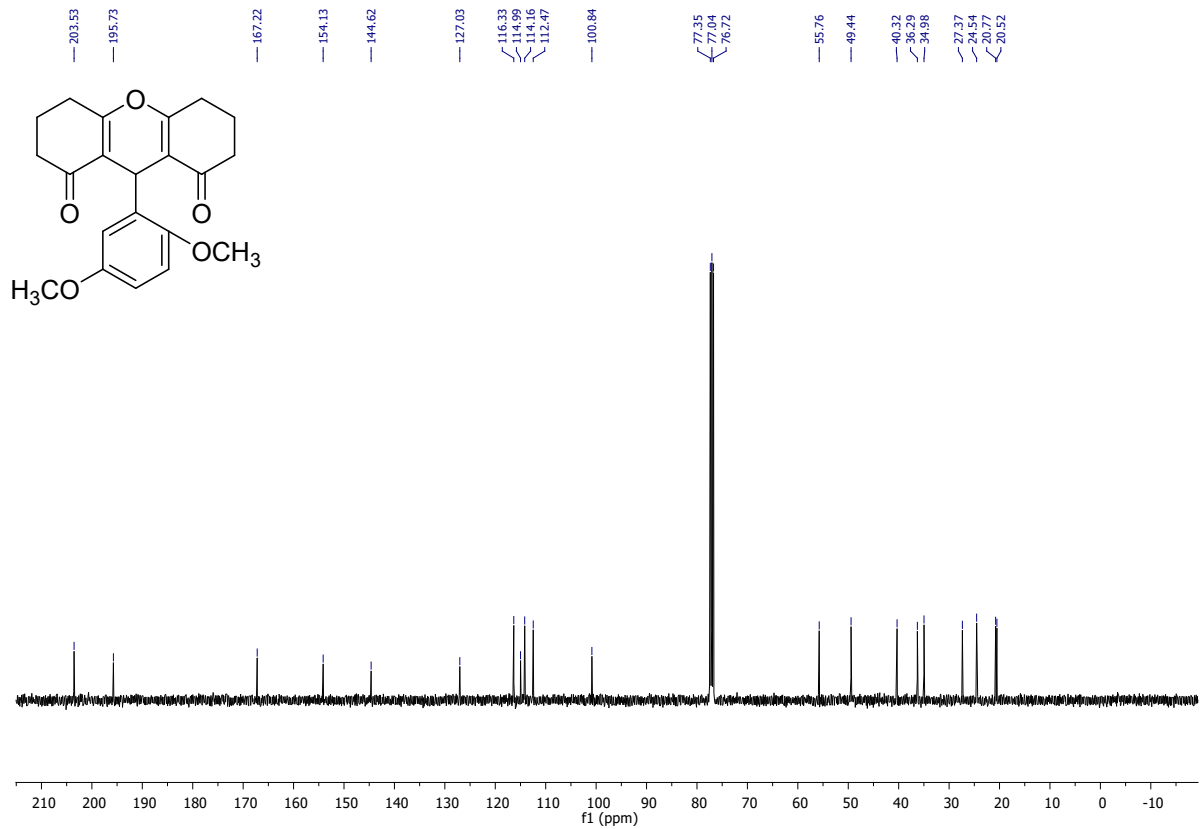

# <sup>1</sup>H and <sup>13</sup>C NMR of compound 14f

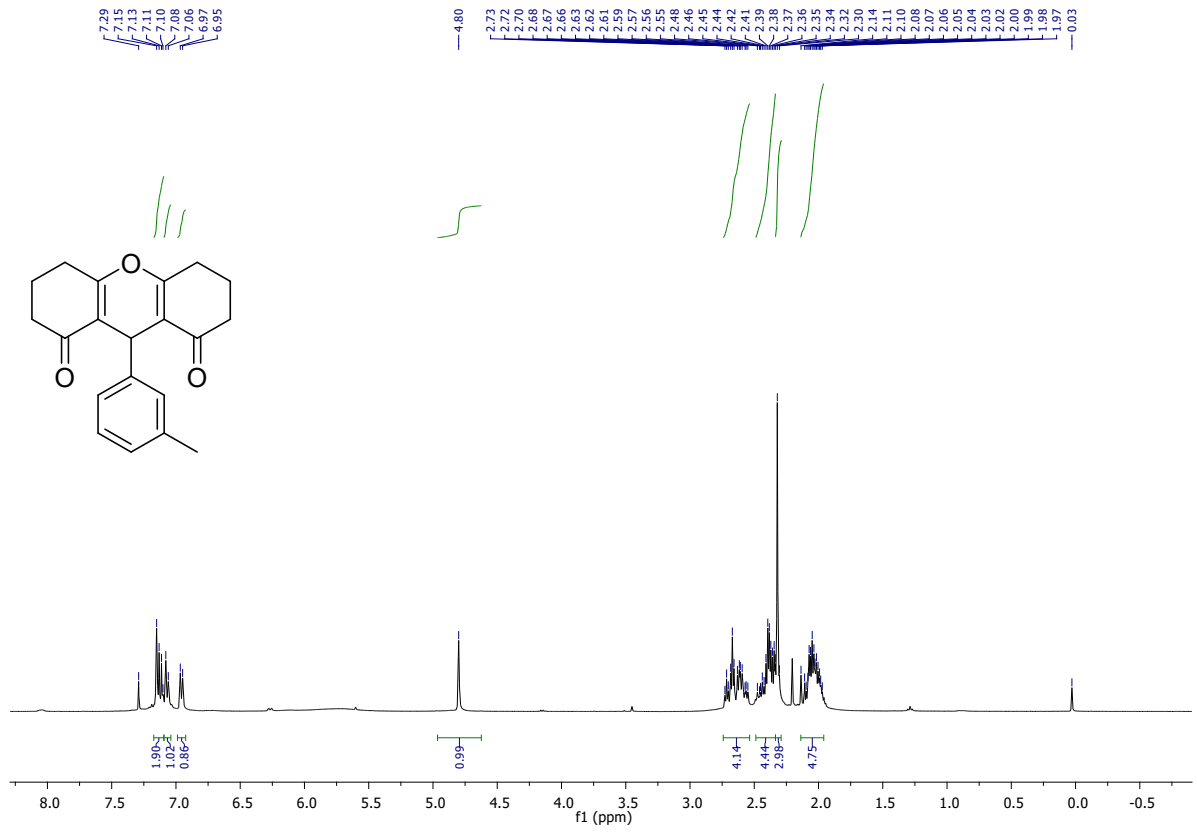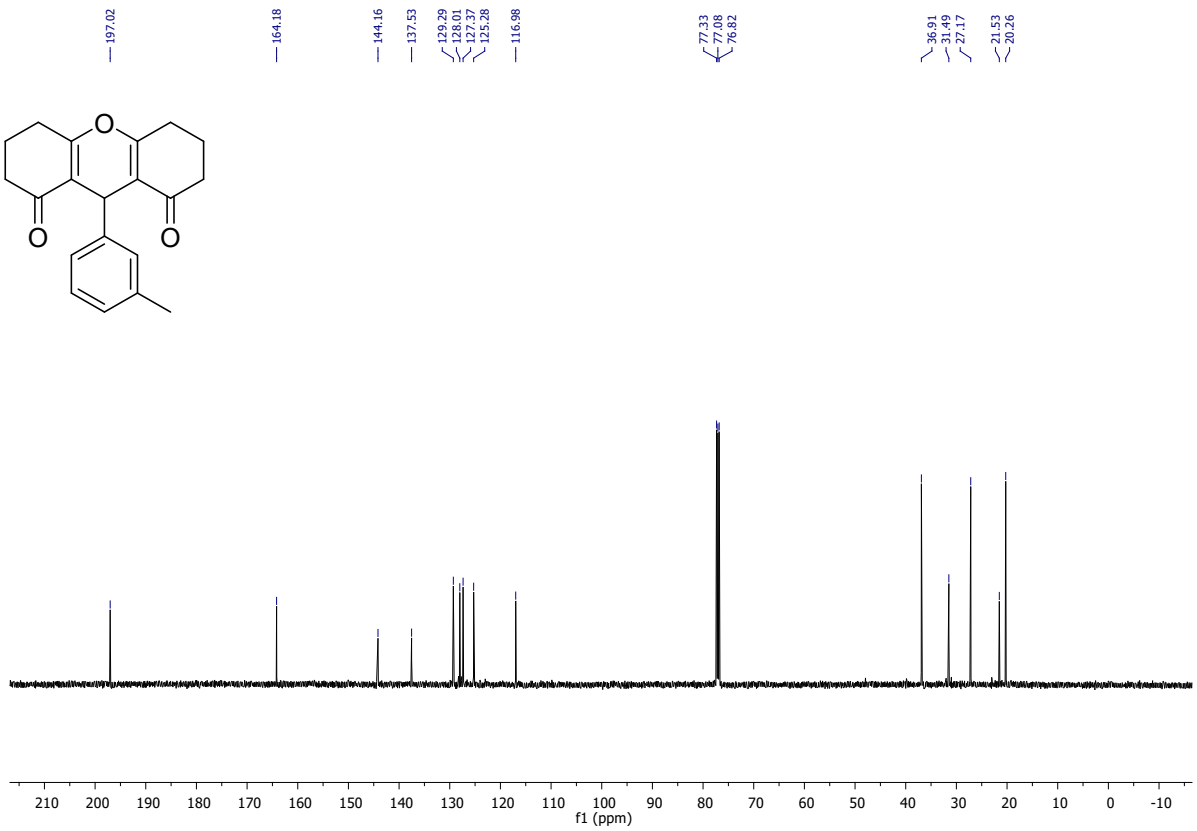

# <sup>1</sup>H and <sup>13</sup>C NMR of compound 14g

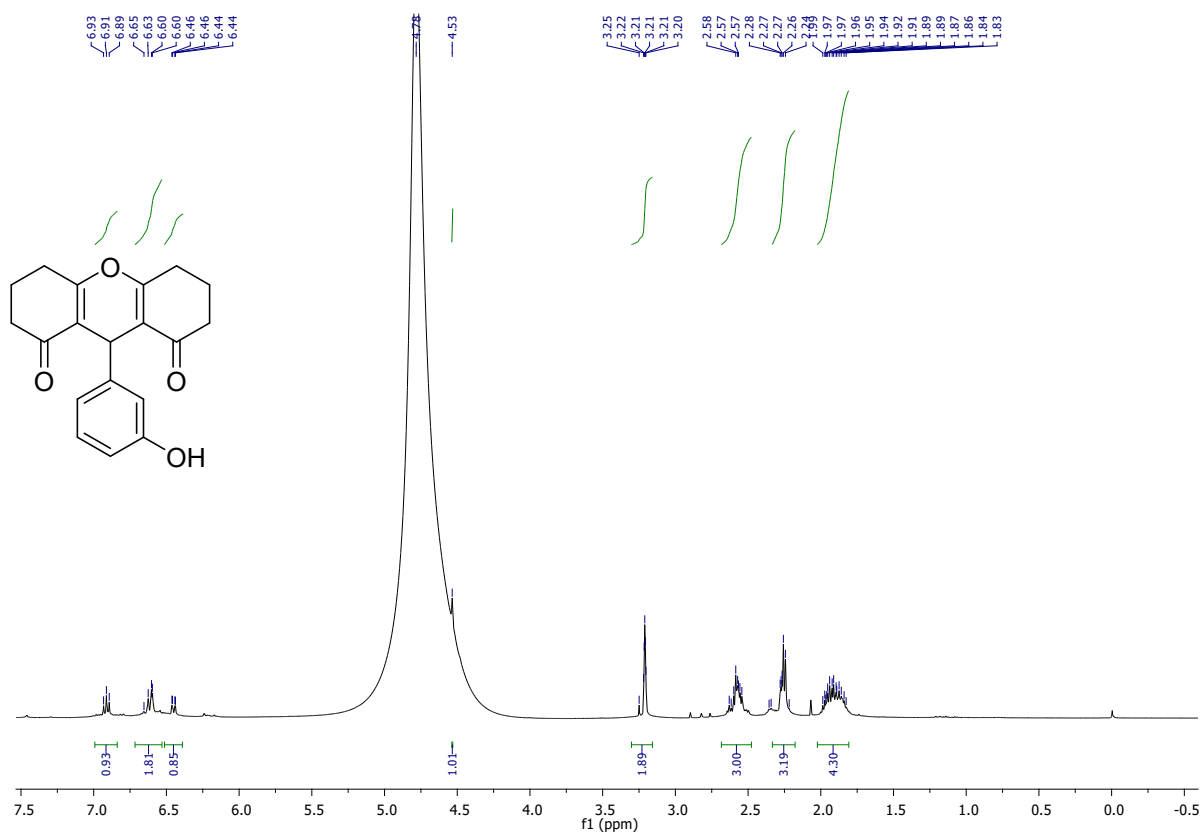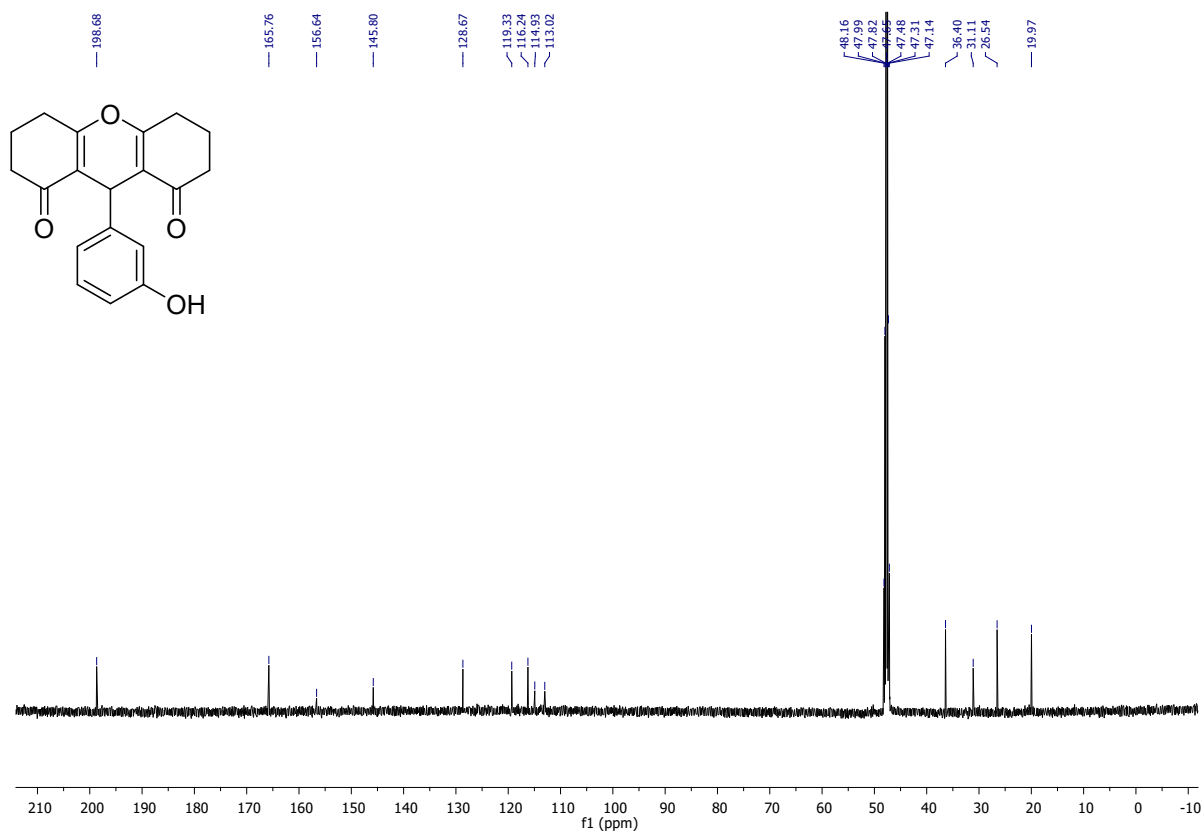

# <sup>1</sup>H and <sup>13</sup>C NMR of compound 14h

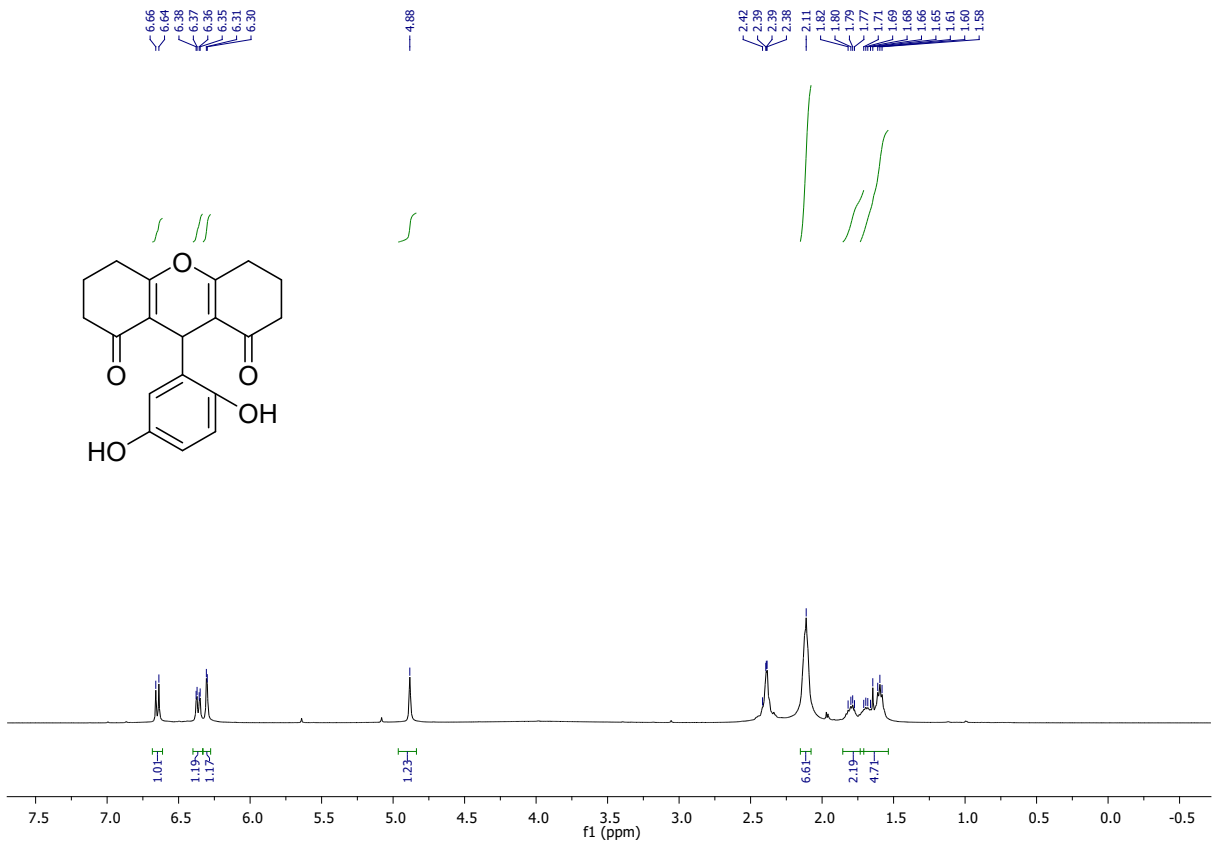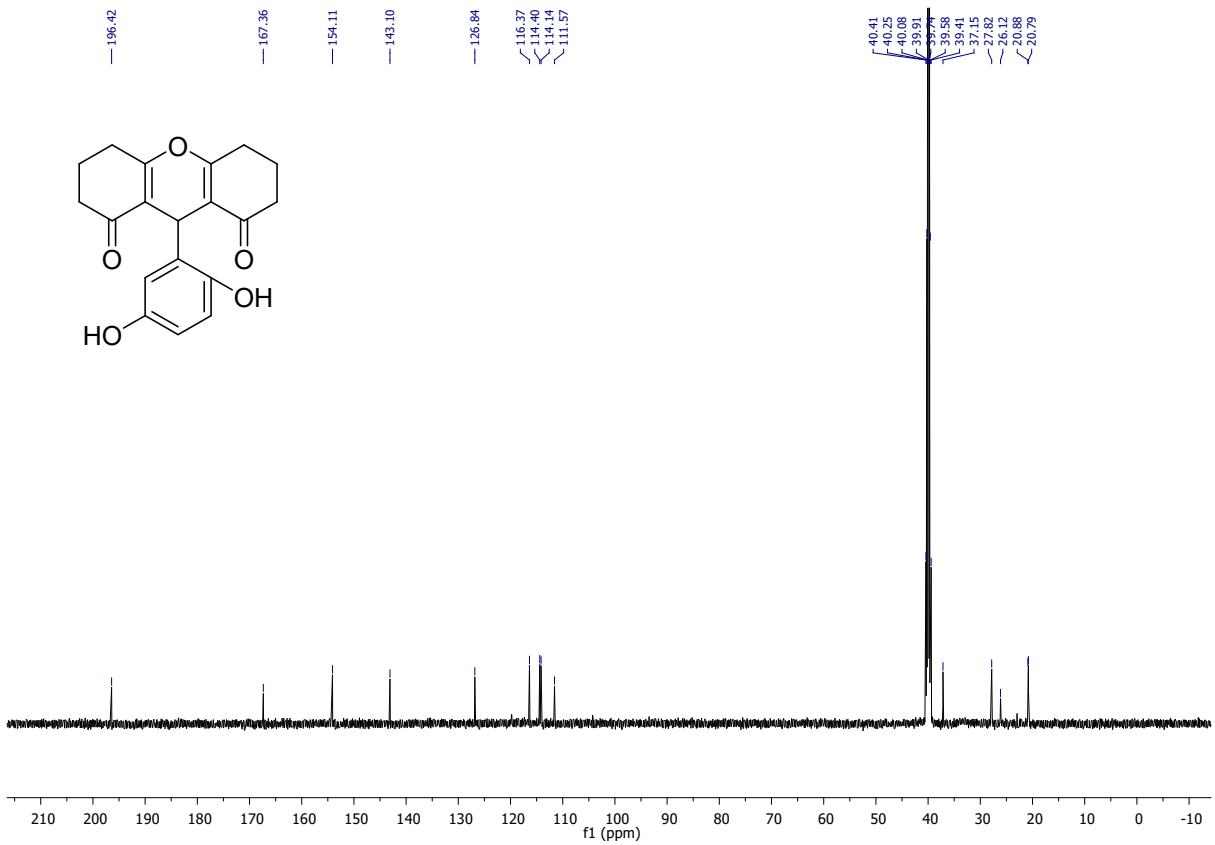

# <sup>1</sup>H and <sup>13</sup>C NMR of compound 14i

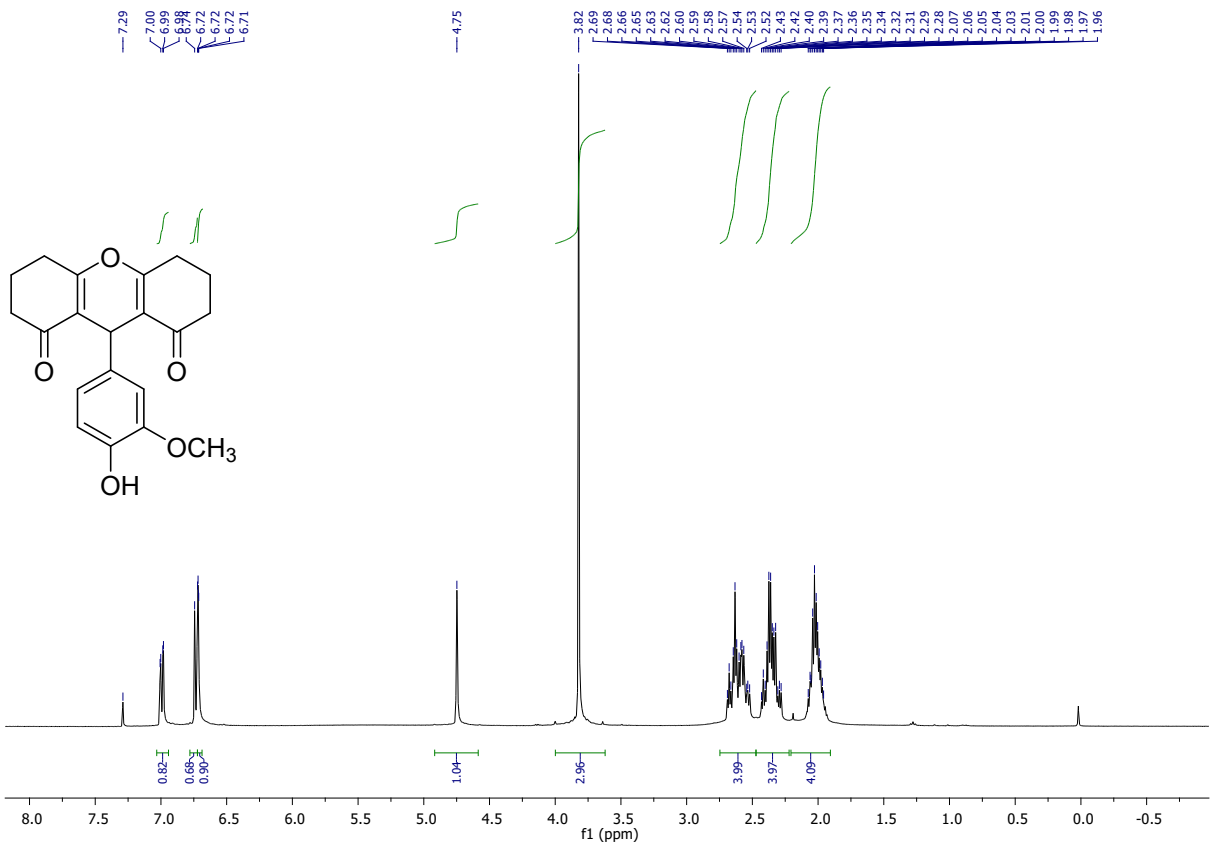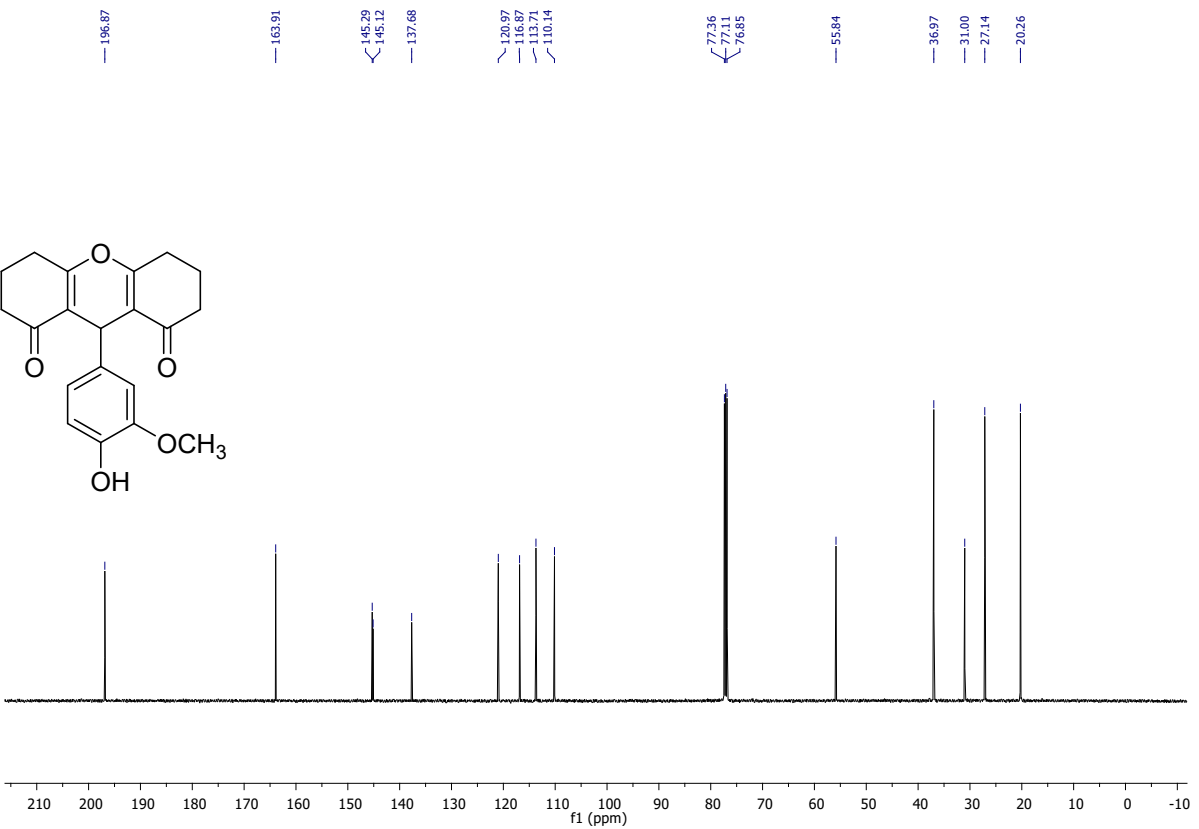

# <sup>1</sup>H and <sup>13</sup>C NMR of compound 14j

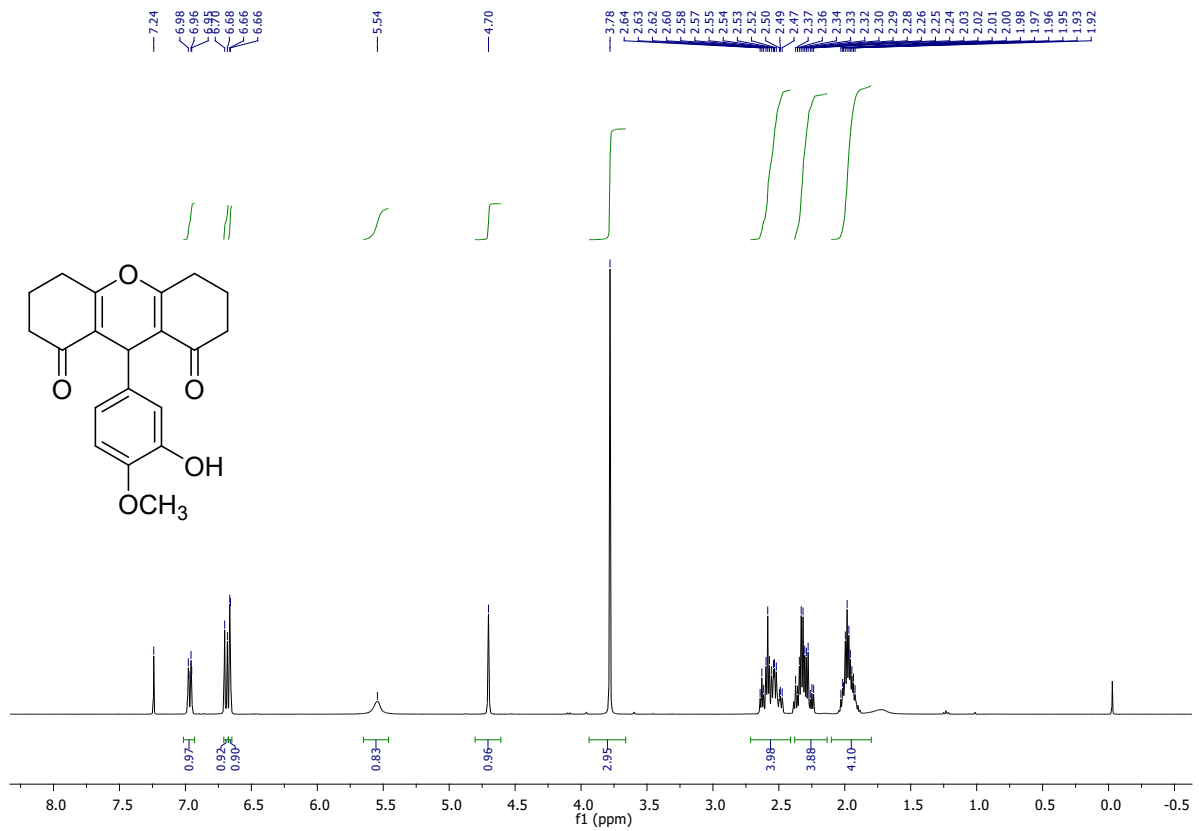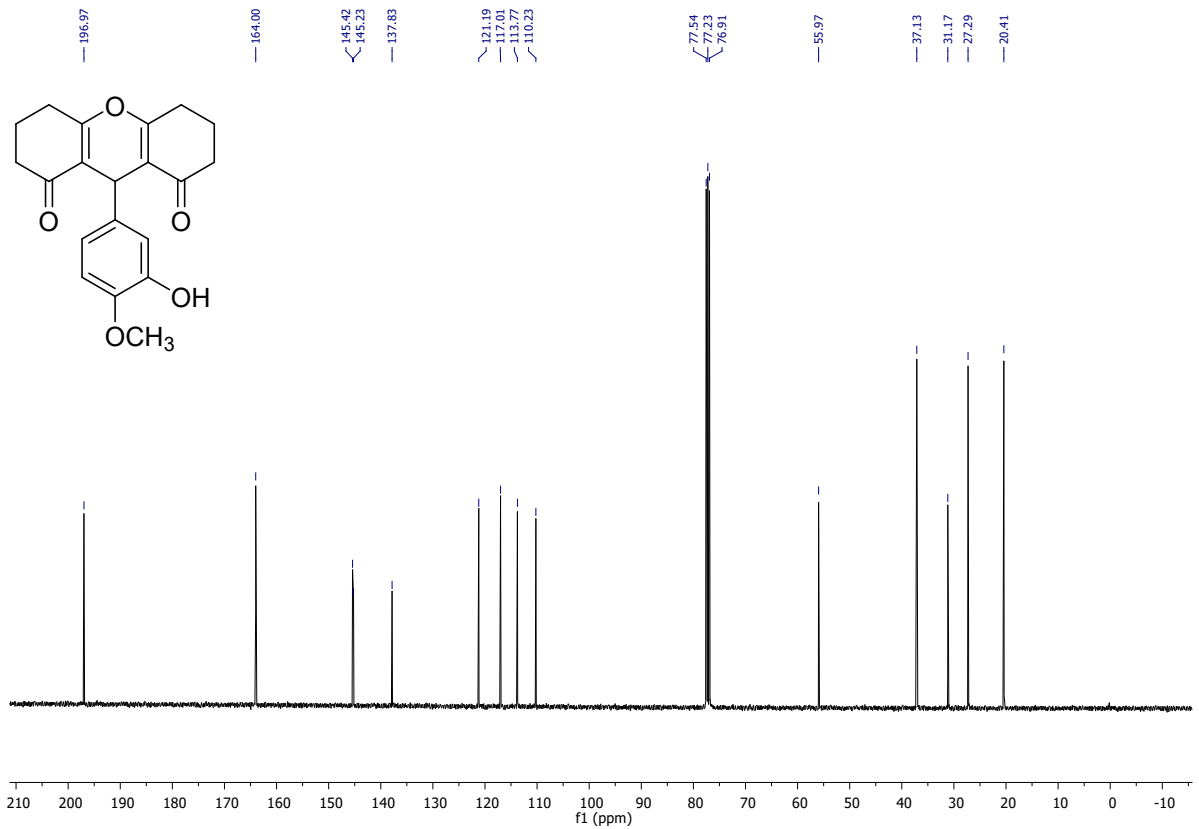

# <sup>1</sup>H and <sup>13</sup>C NMR of compound 14k

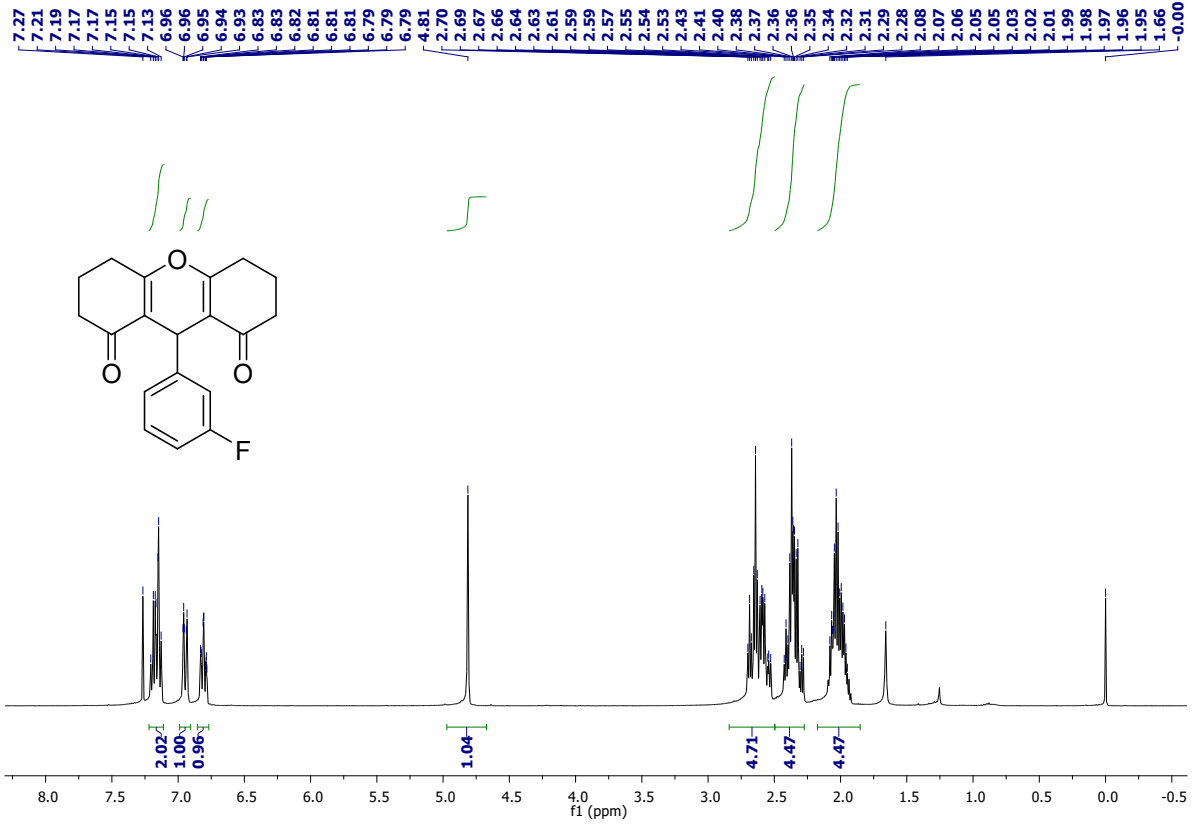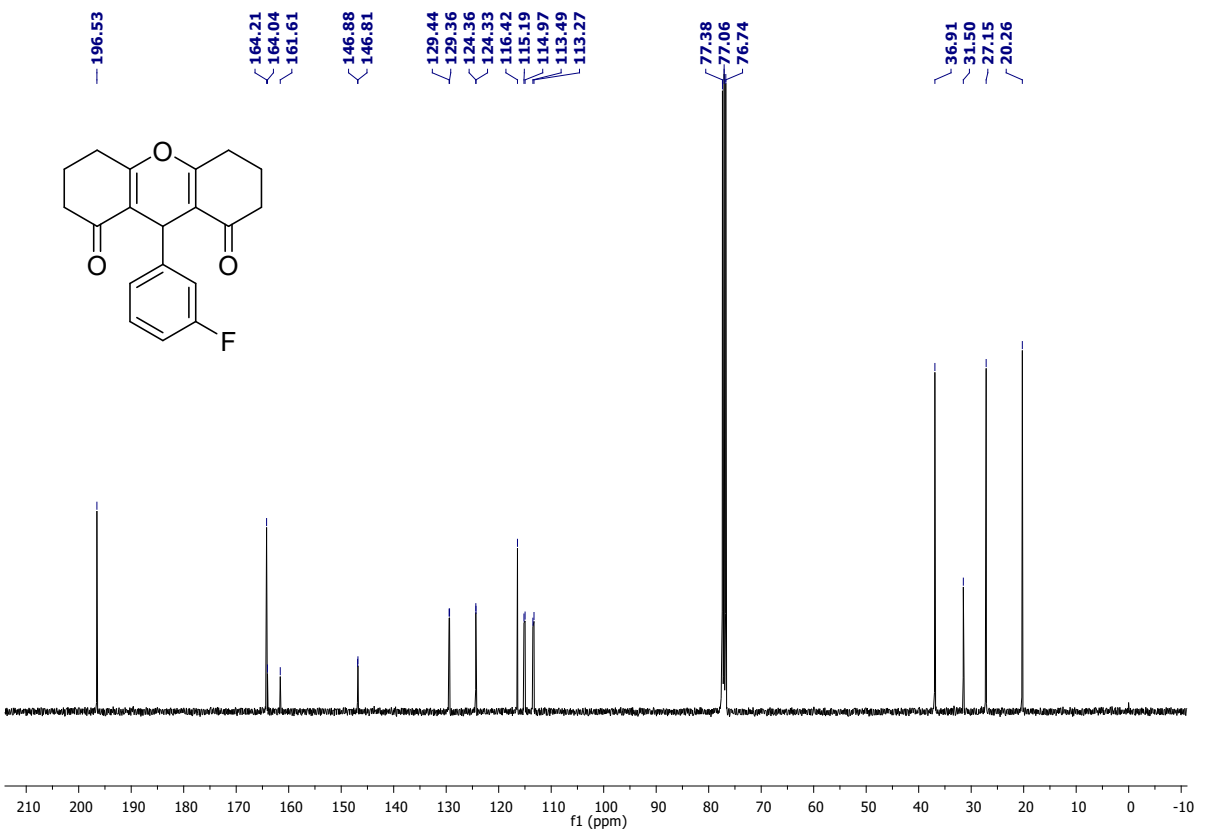



# <sup>1</sup>H and <sup>13</sup>C NMR of compound 14l

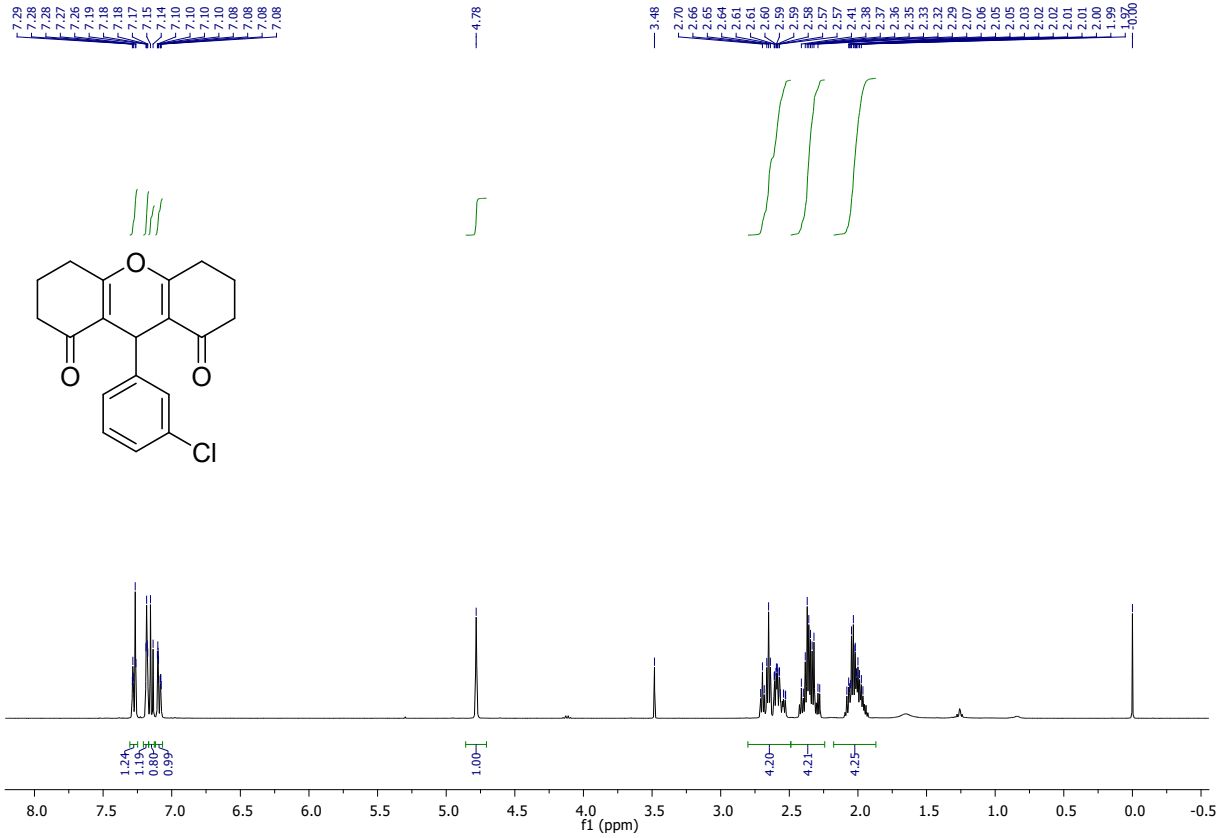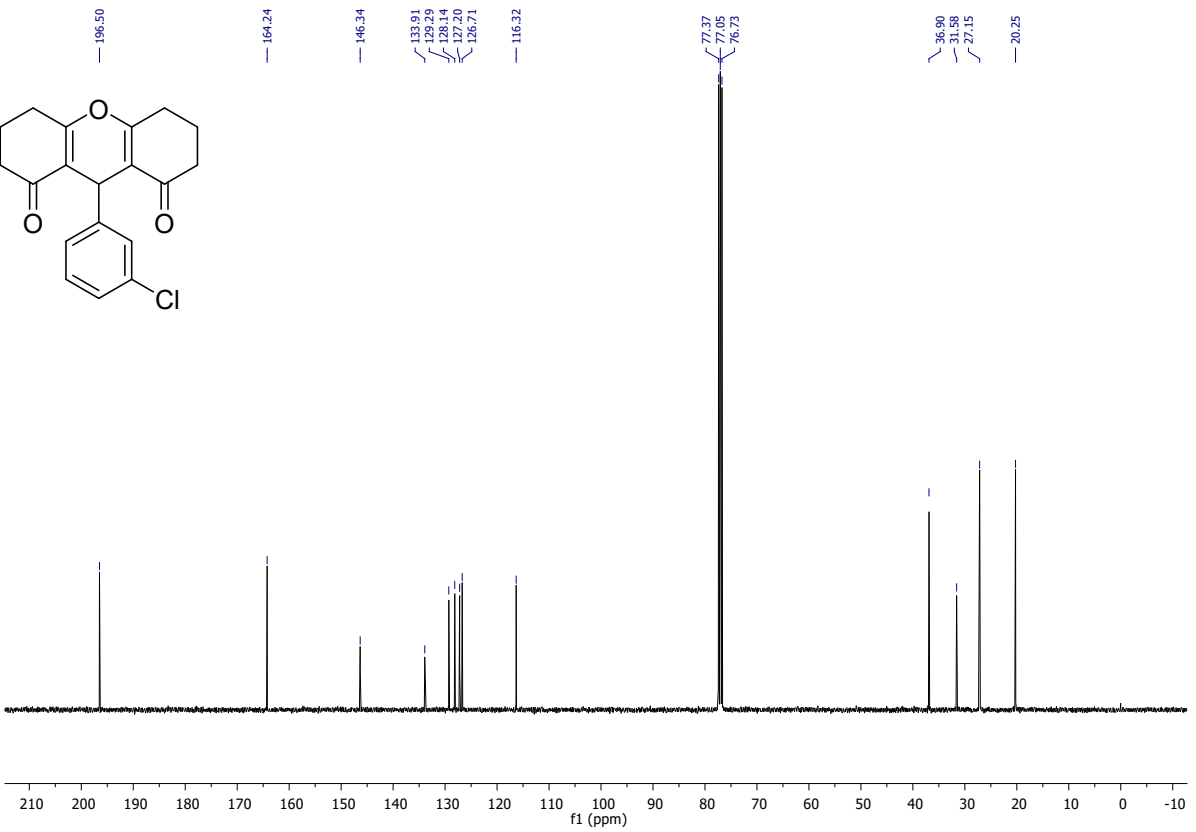

# <sup>1</sup>H and <sup>13</sup>C NMR of compound 14m

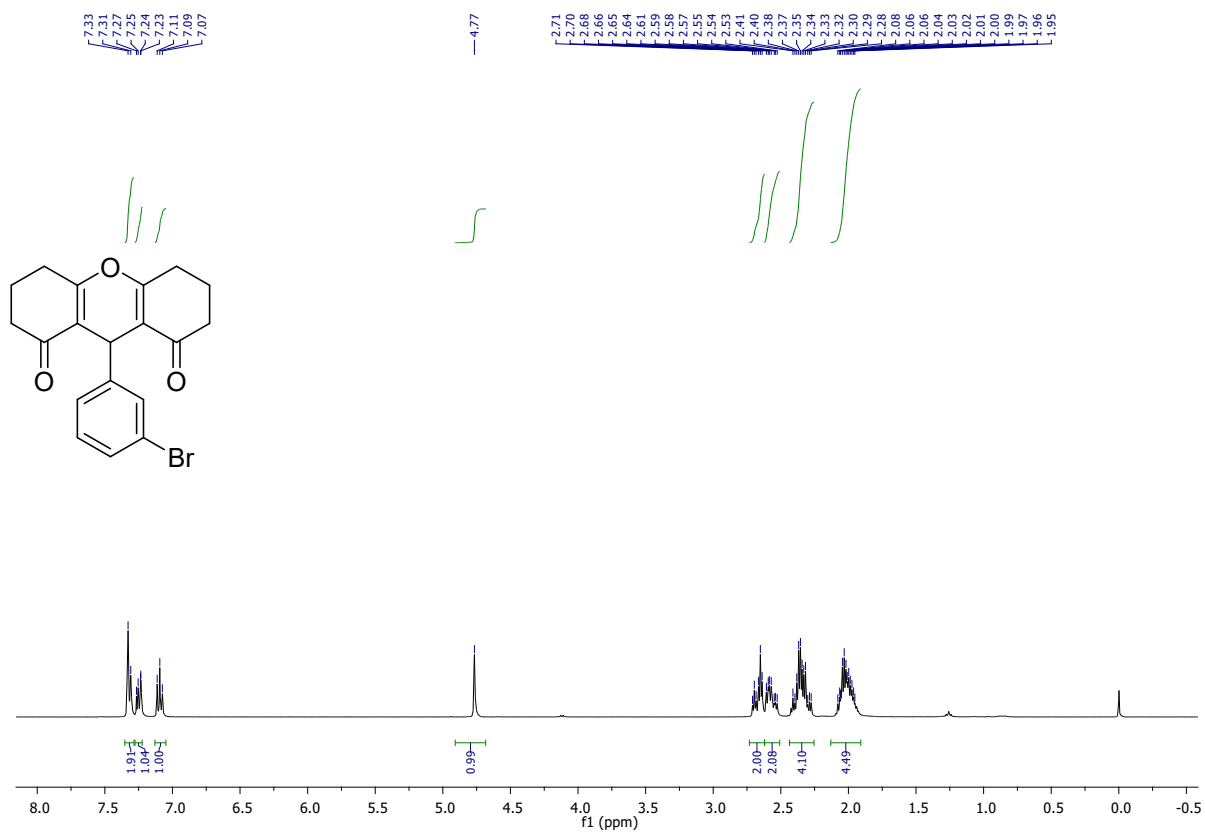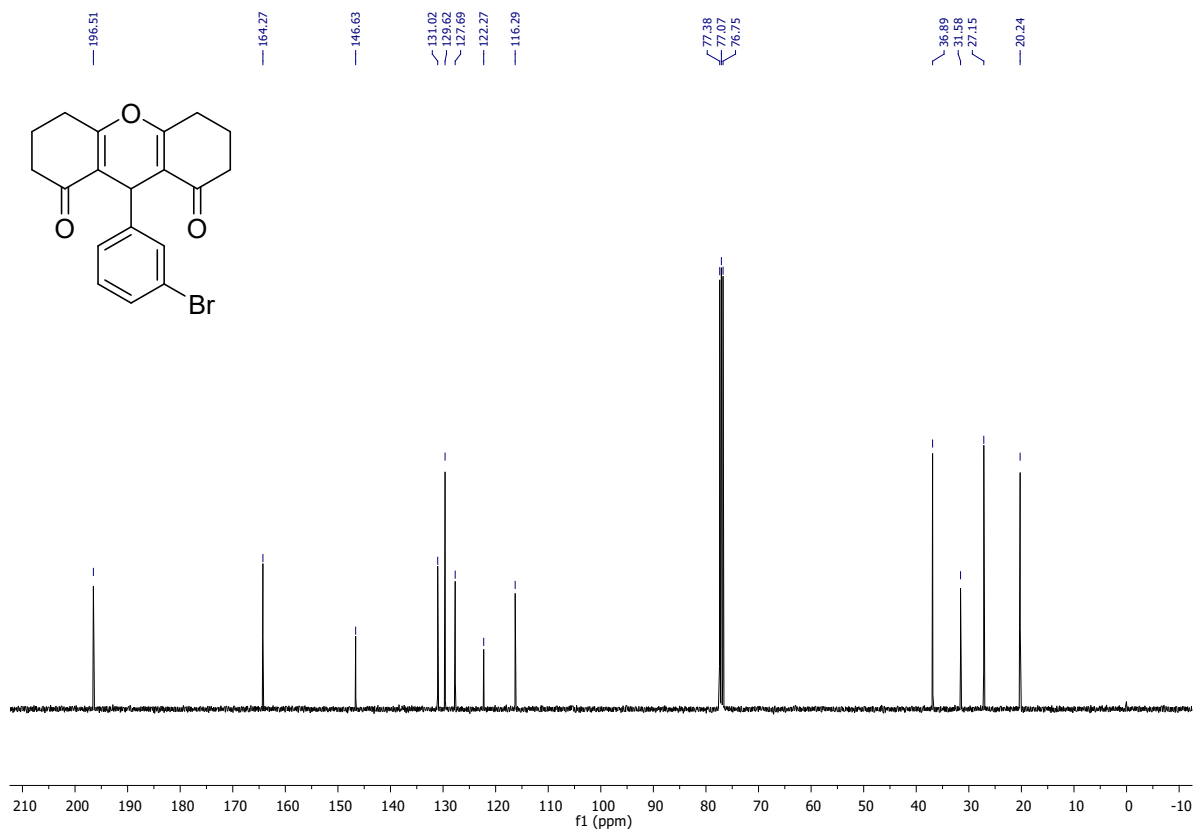

# <sup>1</sup>H and <sup>13</sup>C NMR of compound 14n

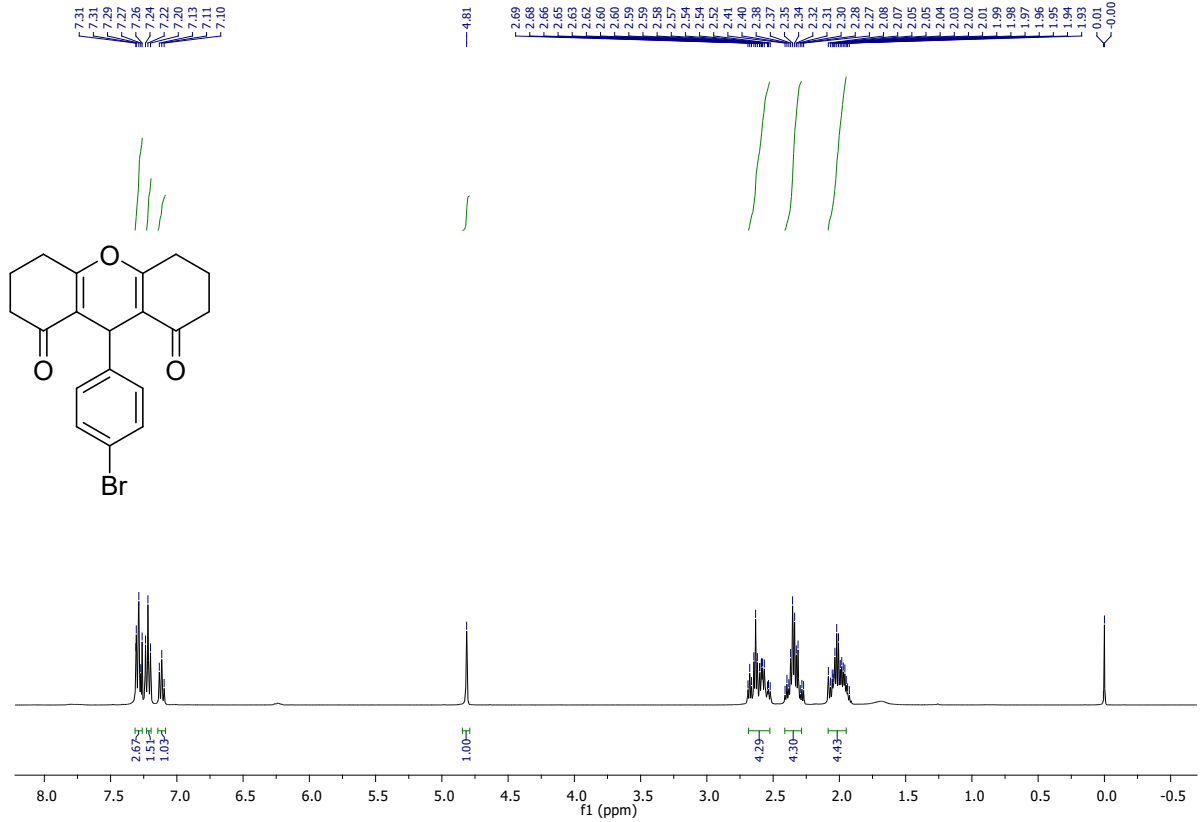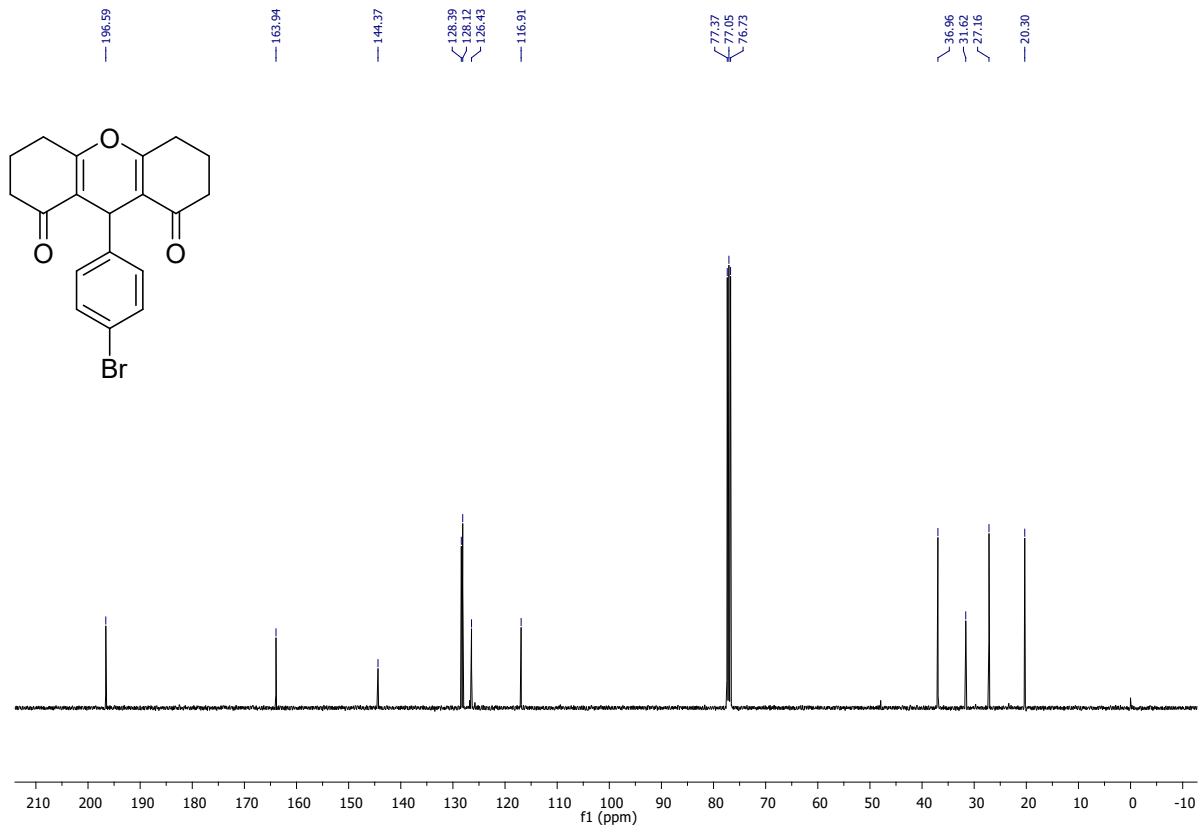

# $^1\text{H}$ and $^{13}\text{C}$ NMR of compound 14o

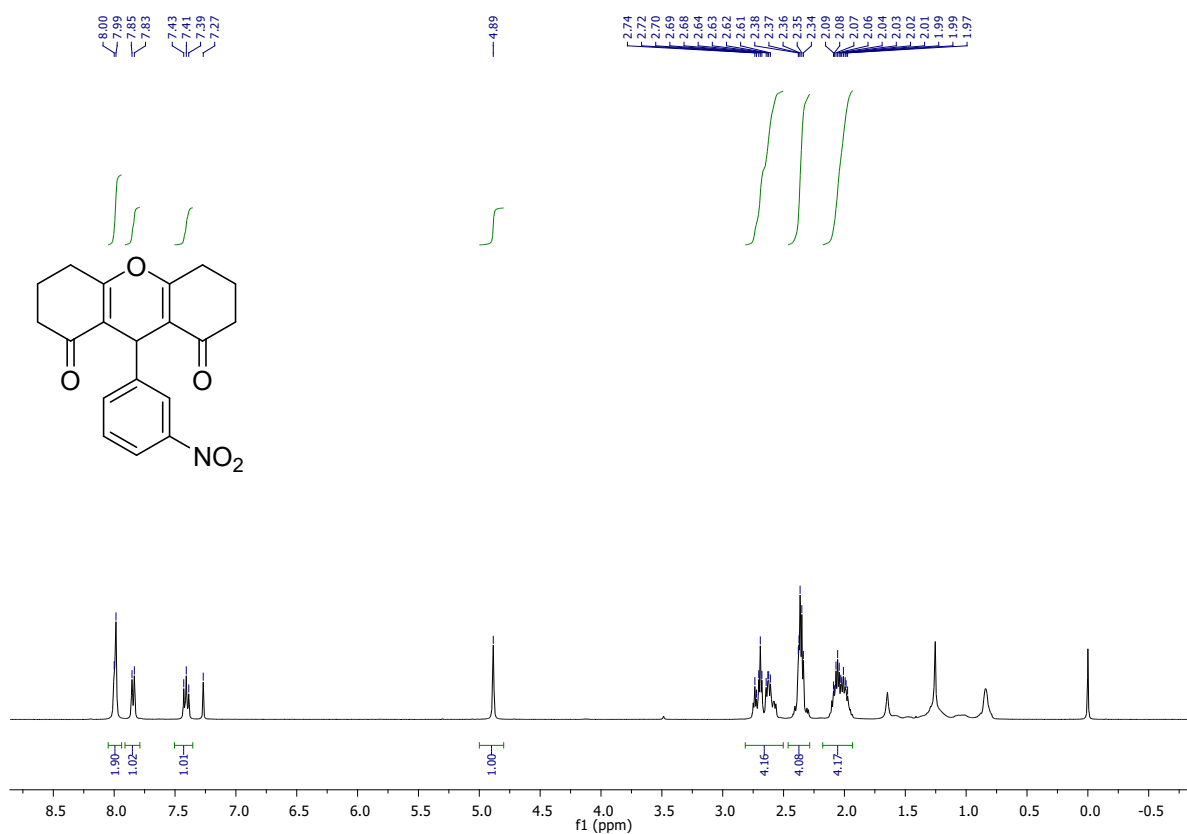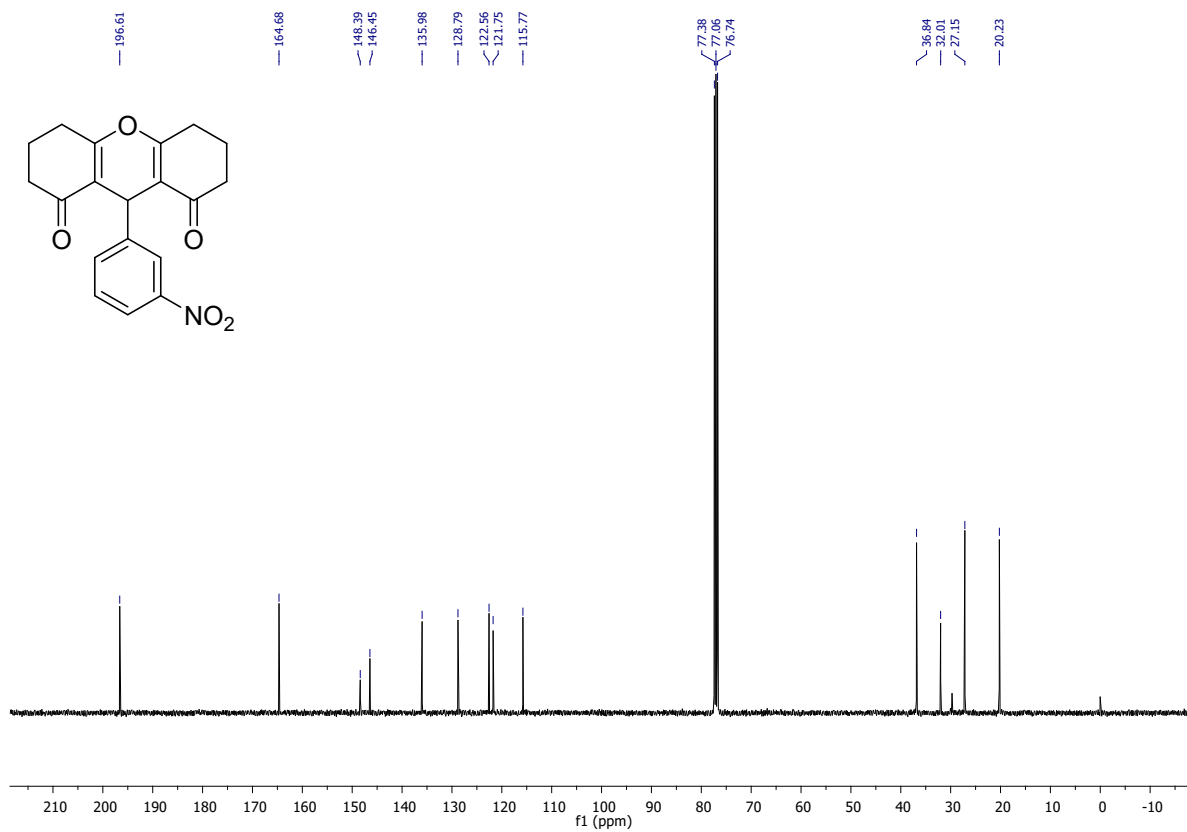

# <sup>1</sup>H and <sup>13</sup>C NMR of compound 14p

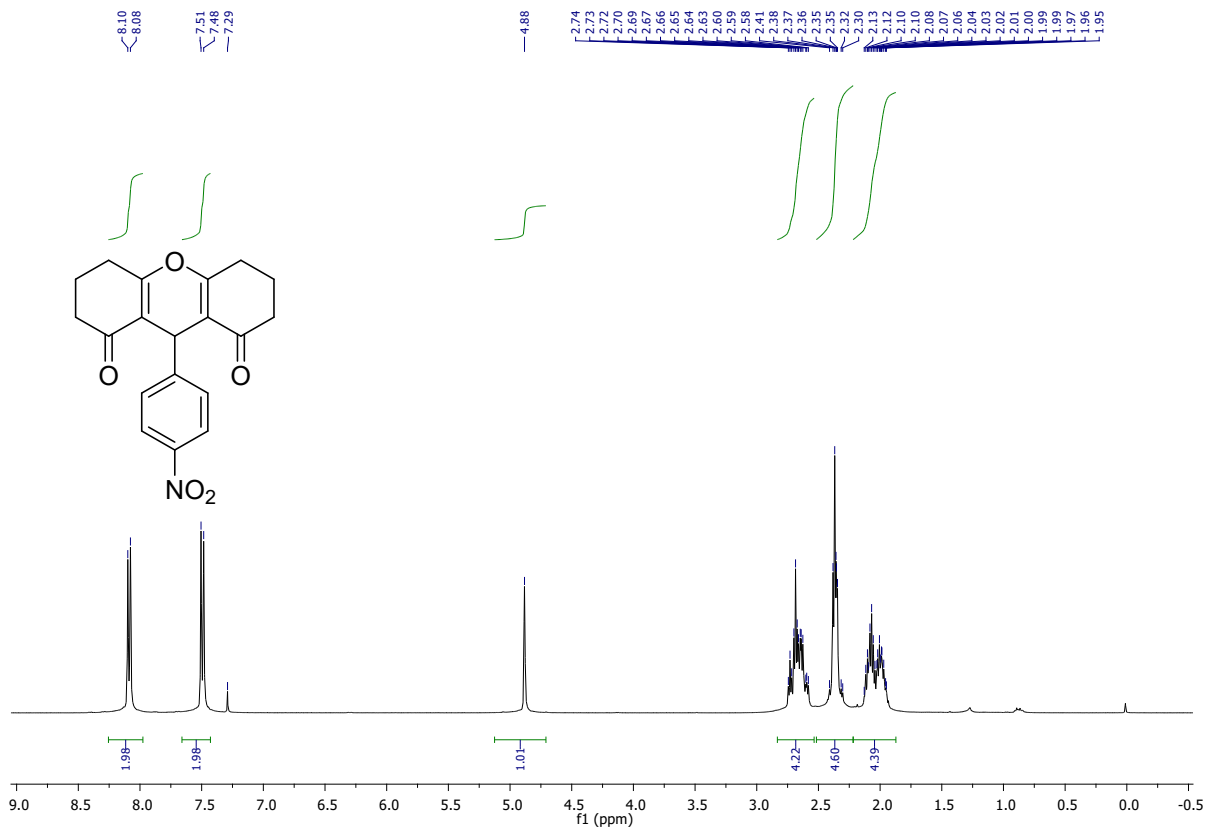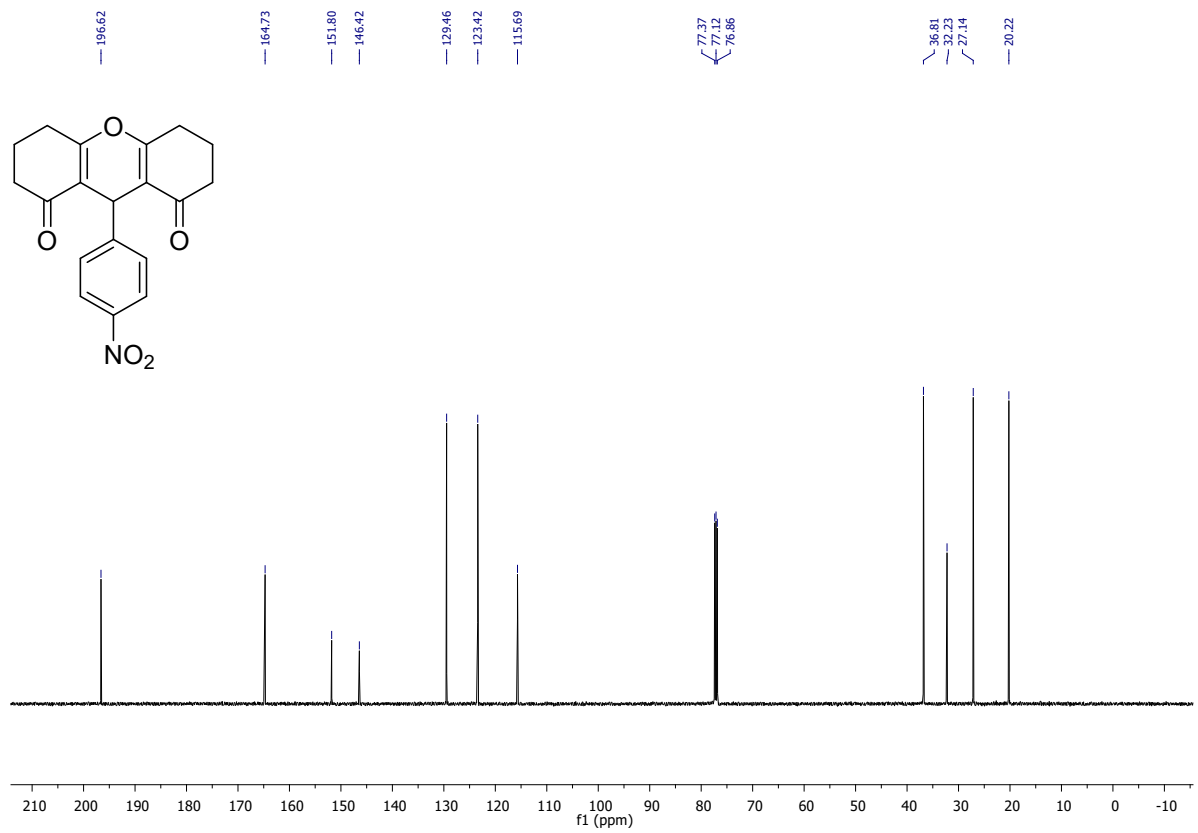

# <sup>1</sup>H and <sup>13</sup>C NMR of compound 14q

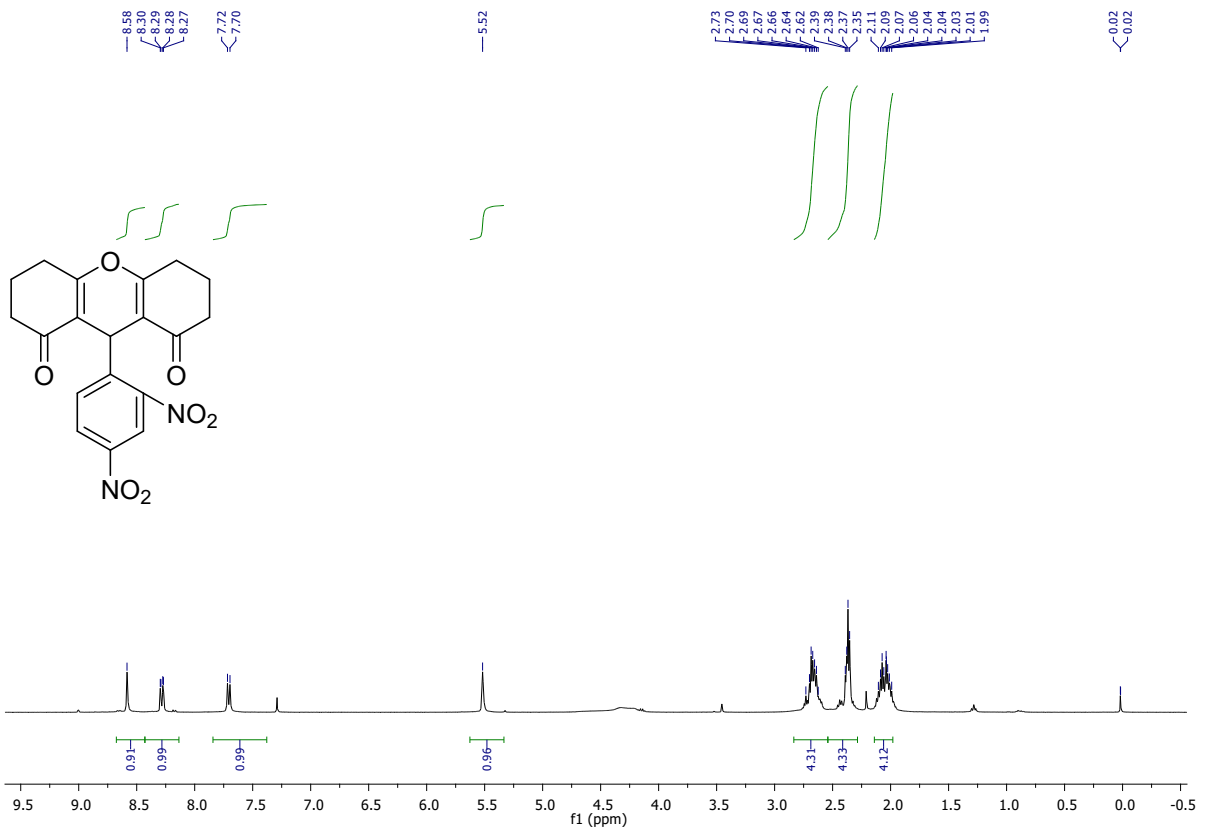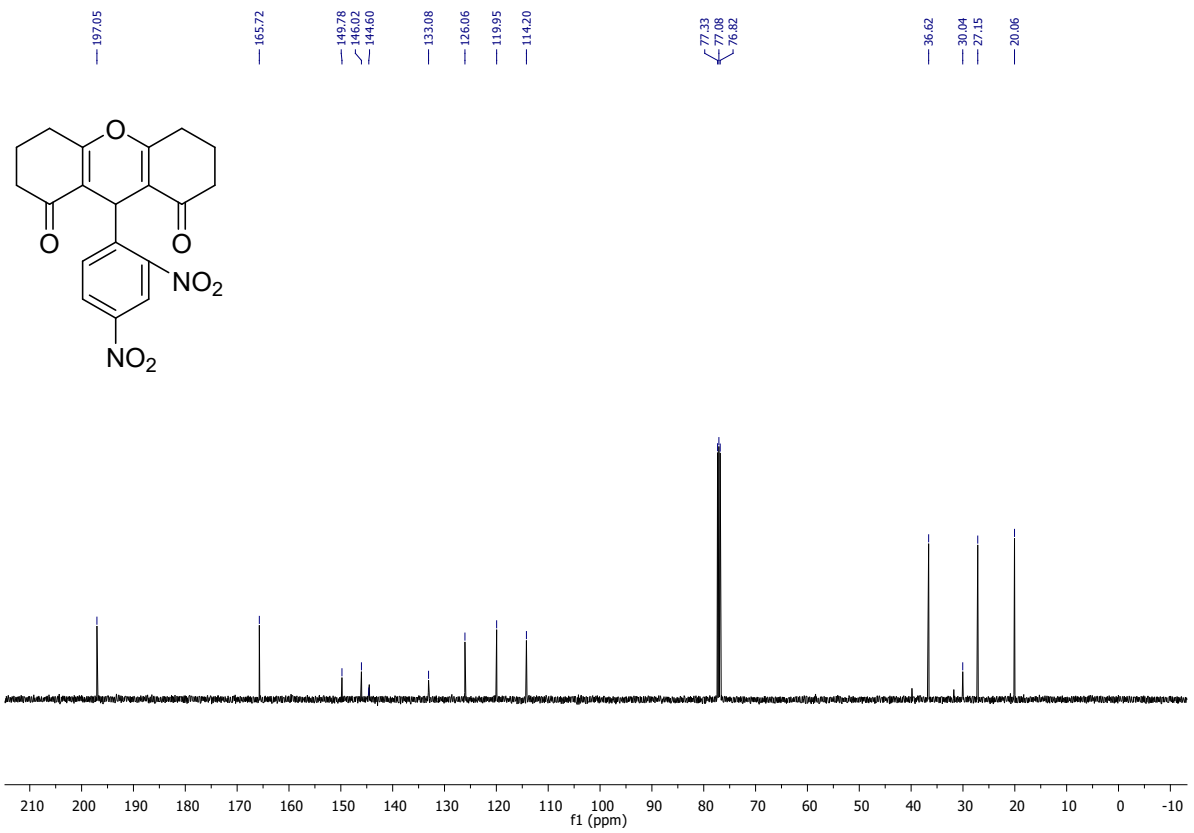

# <sup>1</sup>H and <sup>13</sup>C NMR of compound 14r

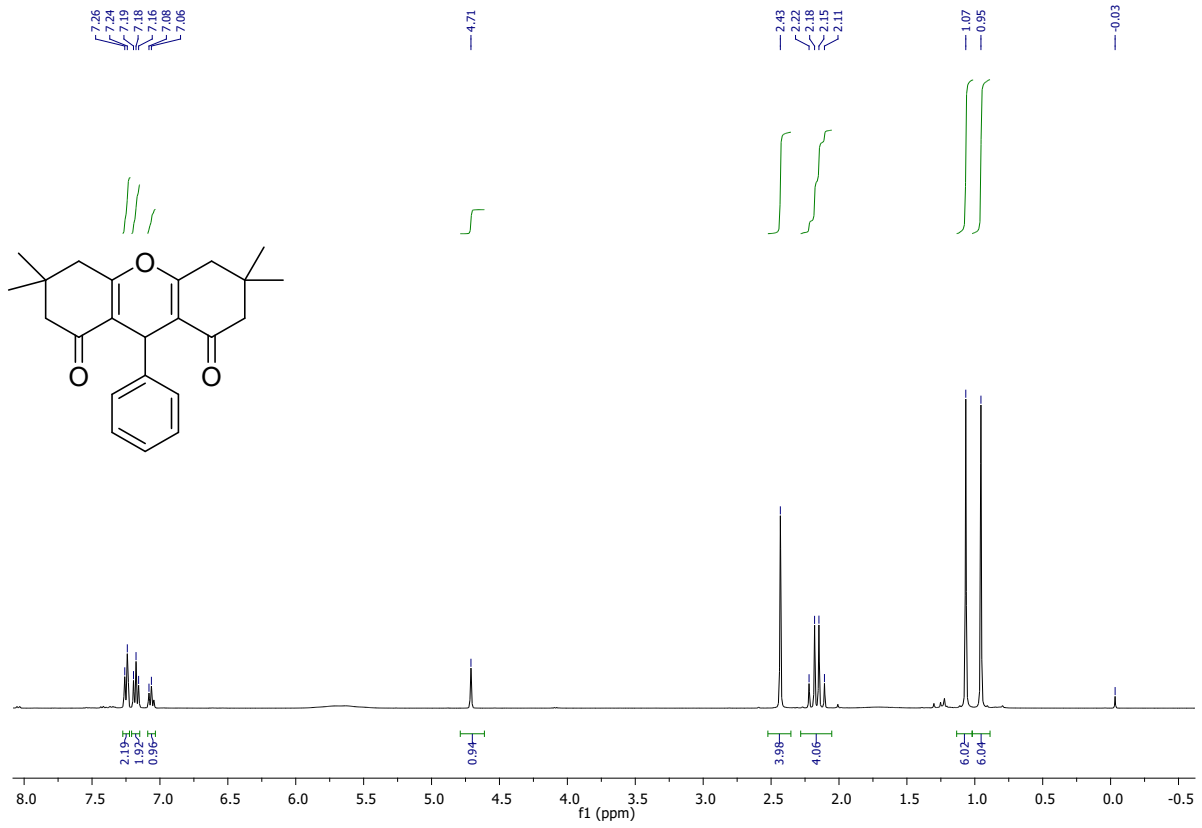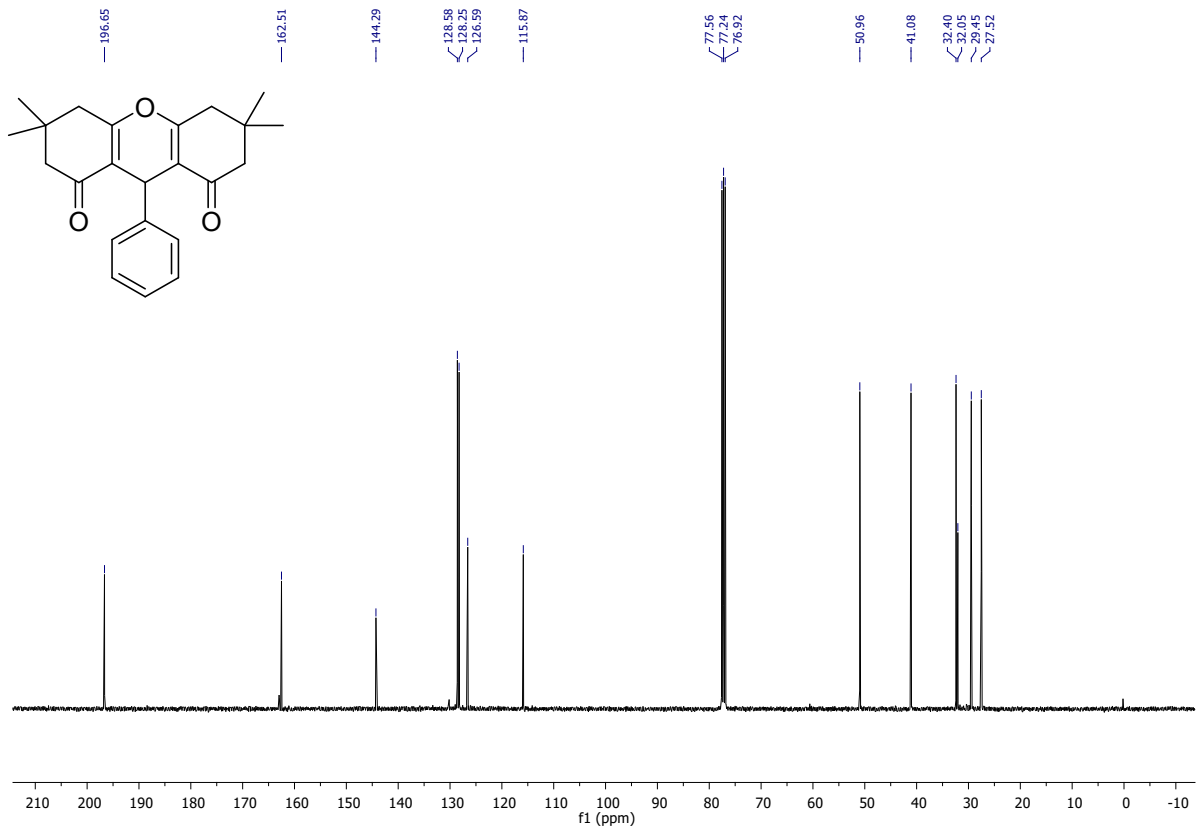

# $^1\text{H}$ and $^{13}\text{C}$ NMR of compound 14s

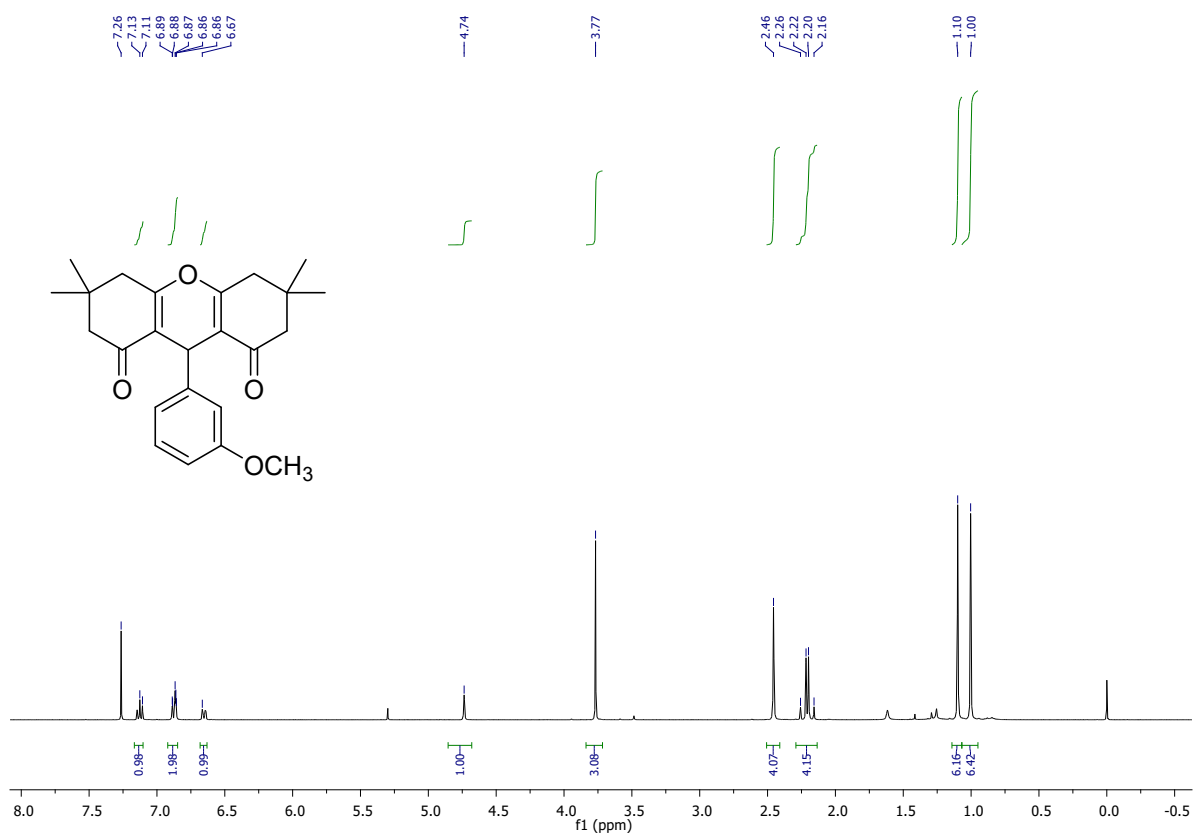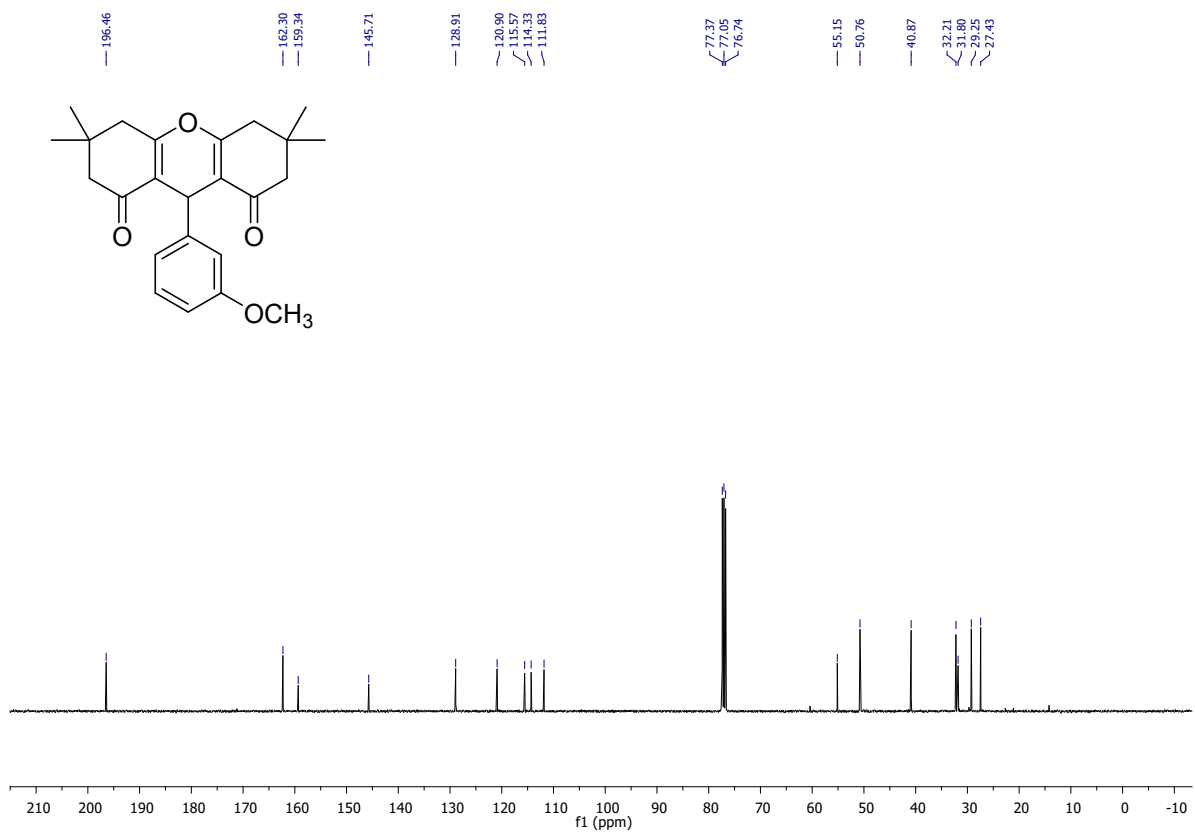



# <sup>1</sup>H and <sup>13</sup>C NMR of compound 14t

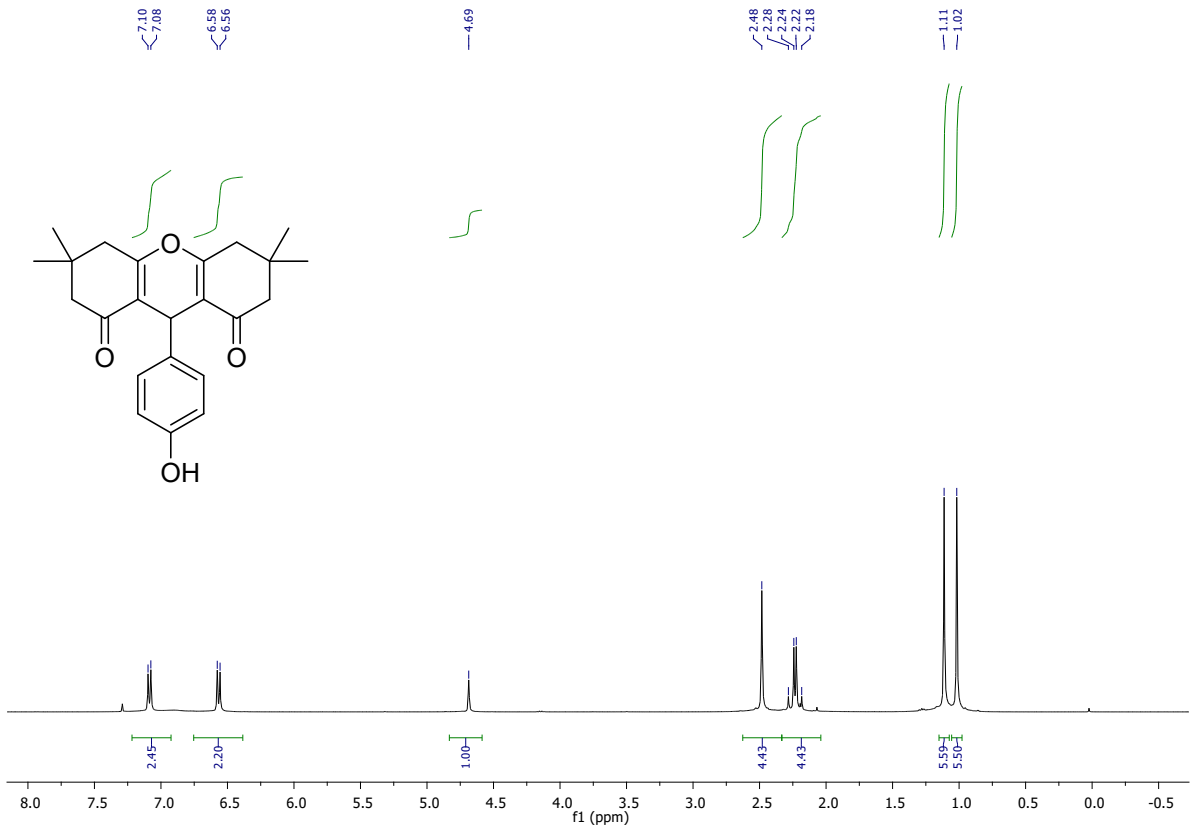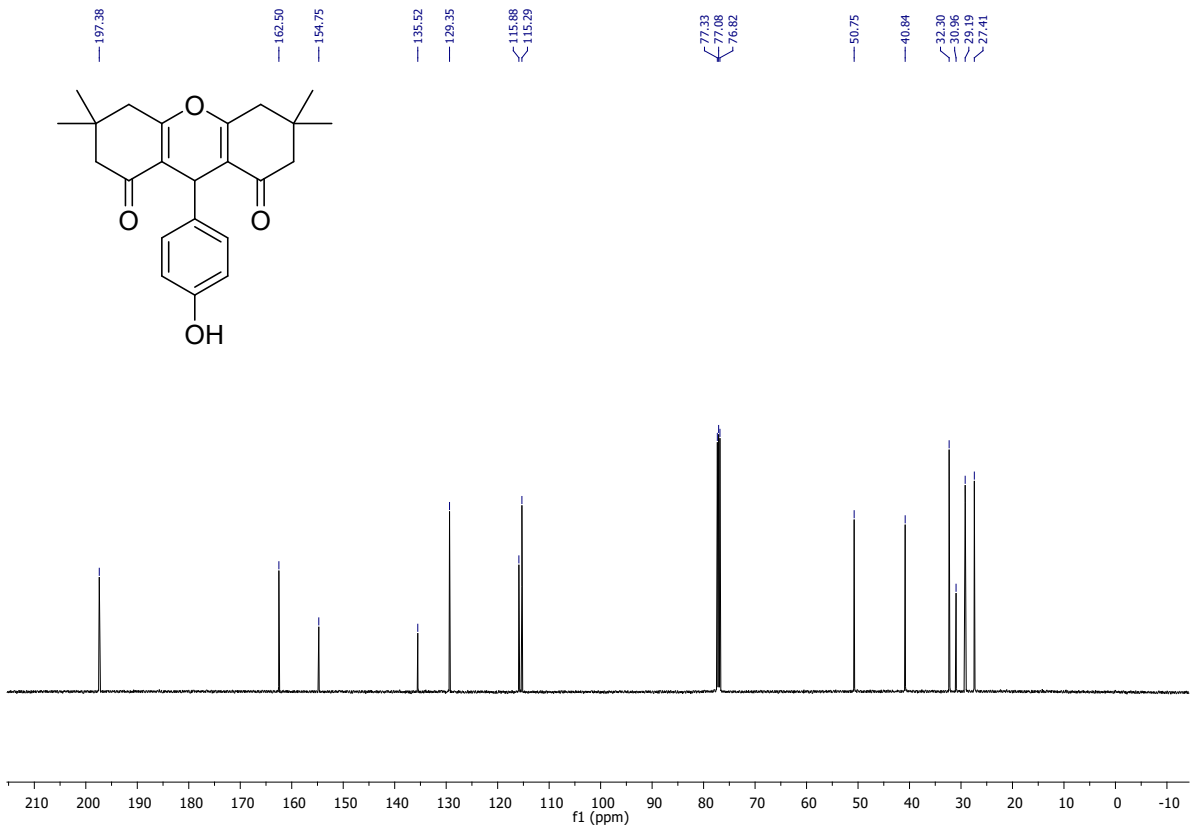

# <sup>1</sup>H and <sup>13</sup>C NMR of compound 14u

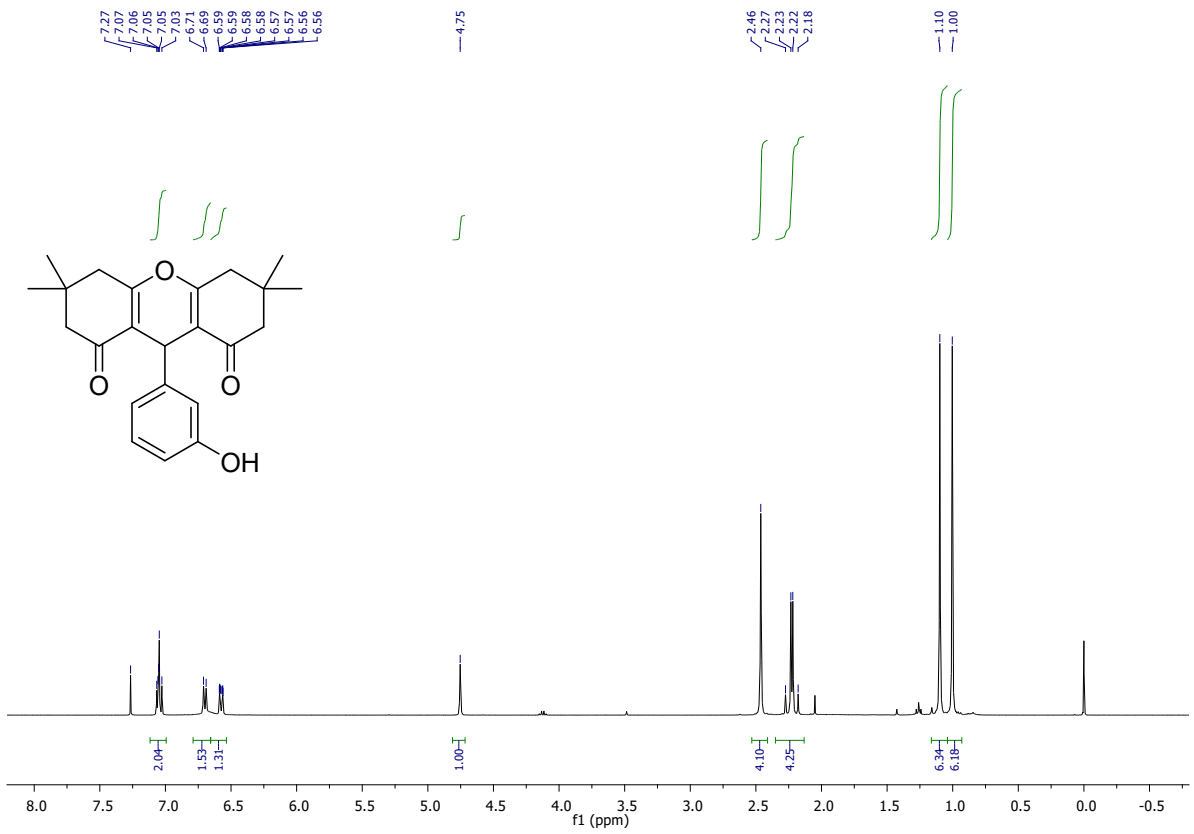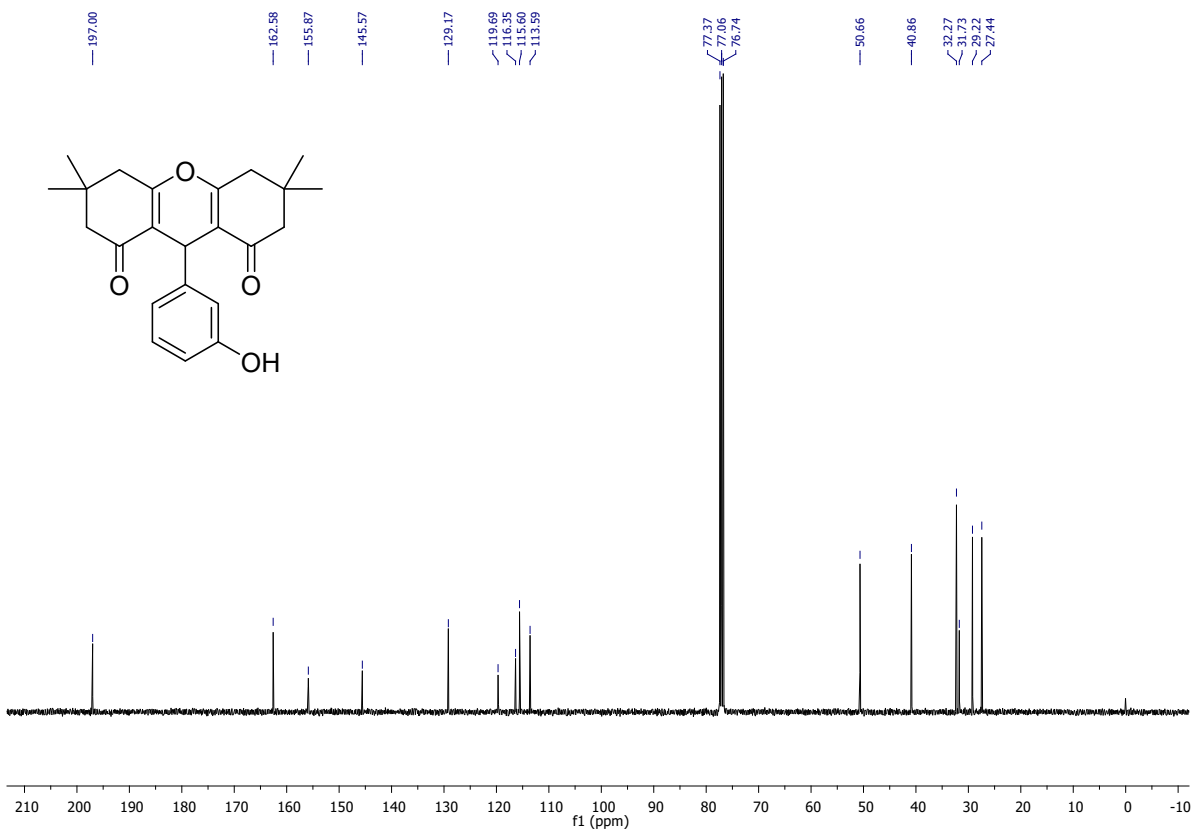

# <sup>1</sup>H and <sup>13</sup>C NMR of compound 14v

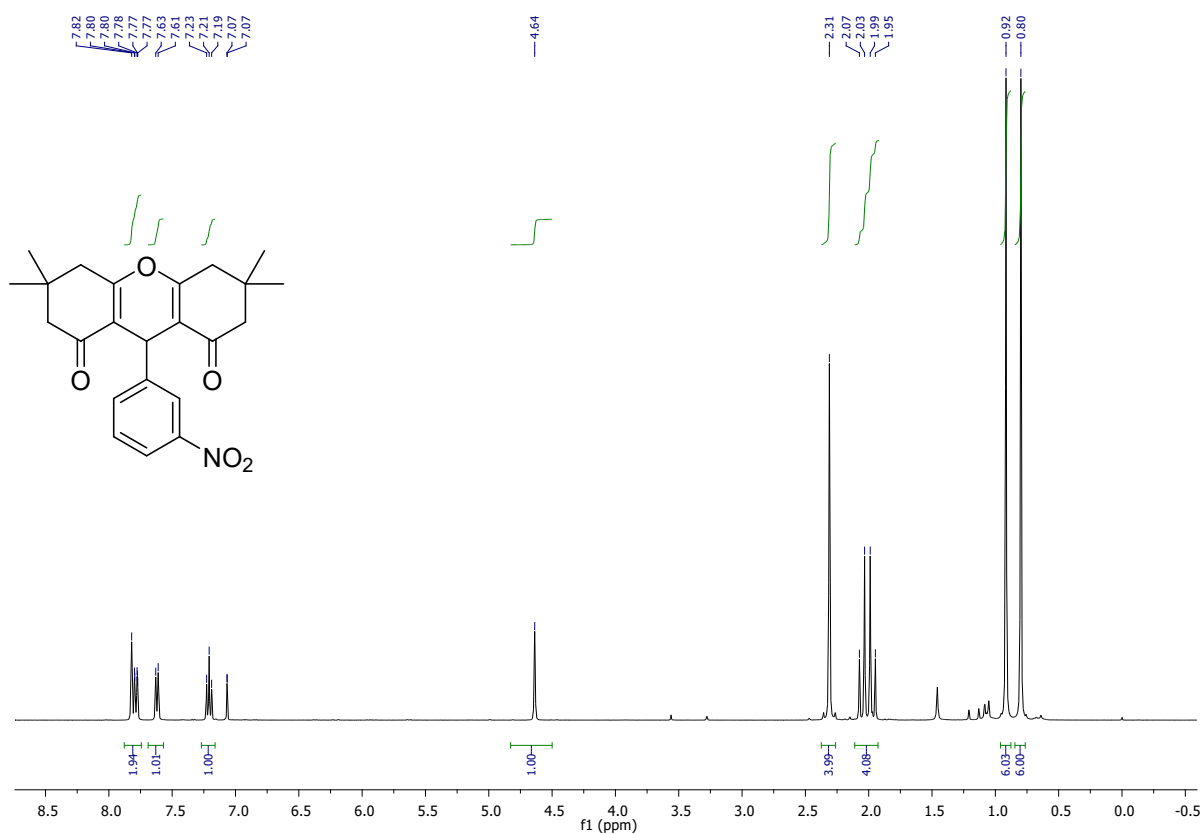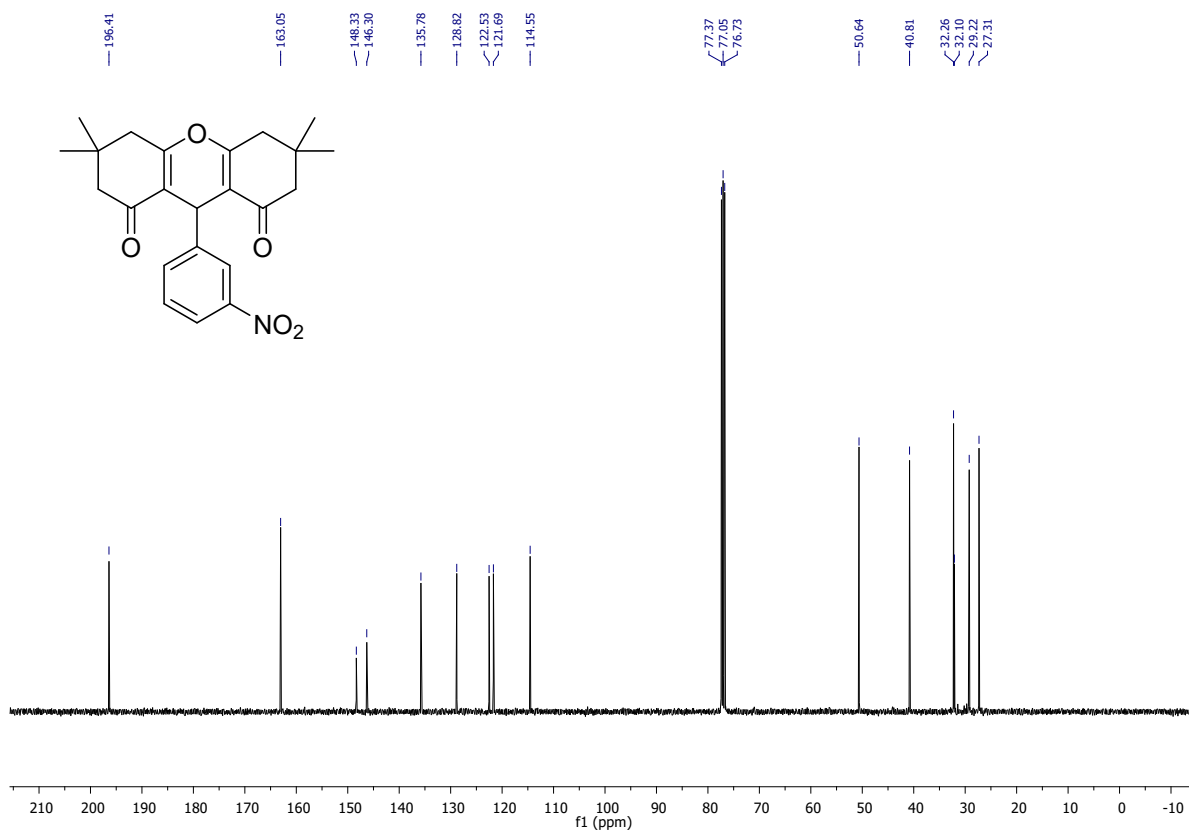

# <sup>1</sup>H and <sup>13</sup>C NMR of compound 14w

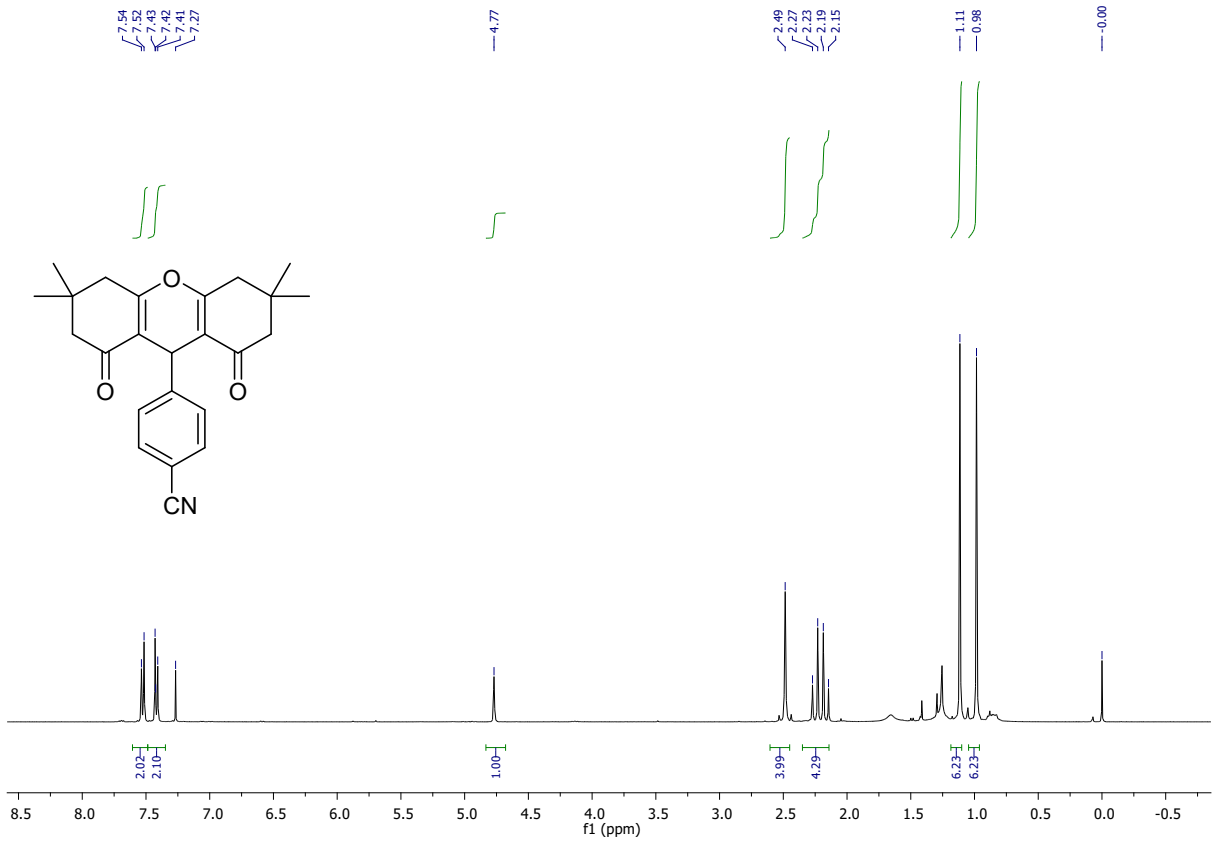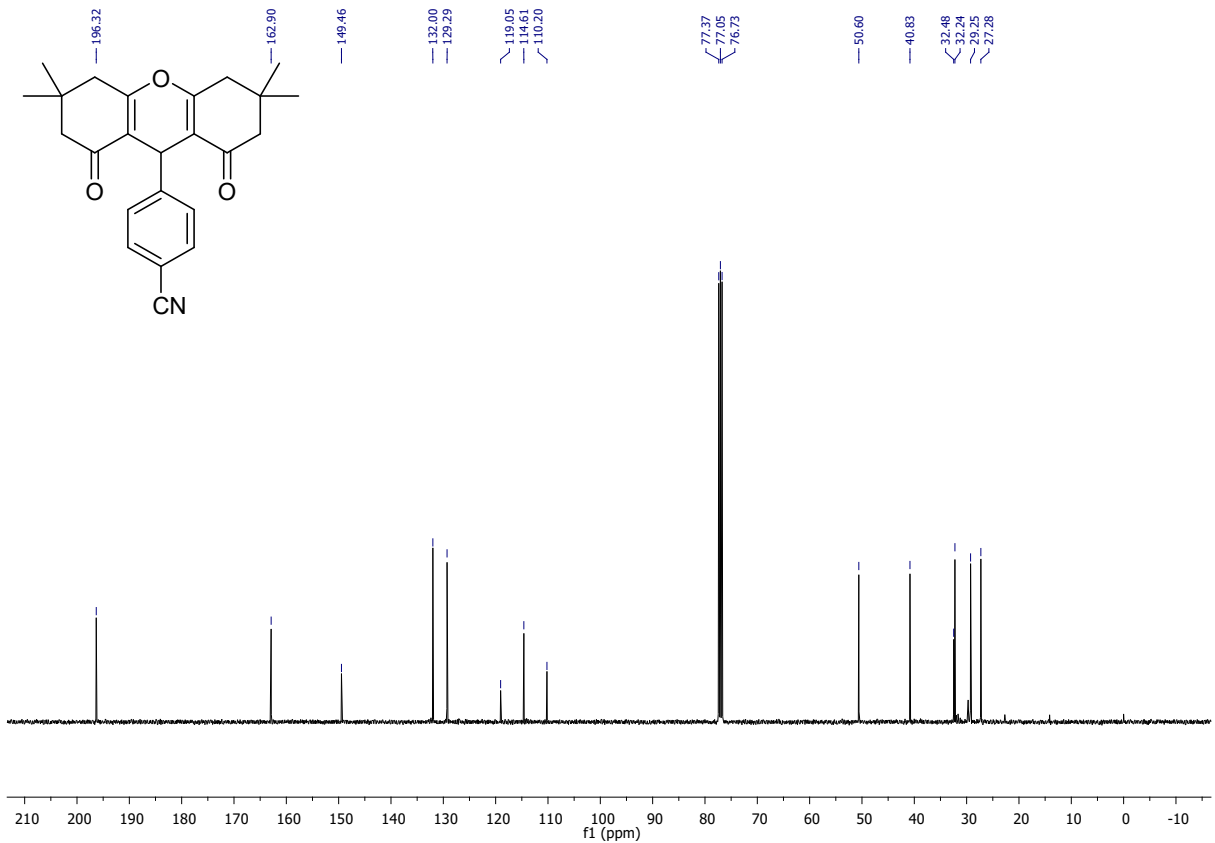

# <sup>1</sup>H and <sup>13</sup>C NMR of compound 14x

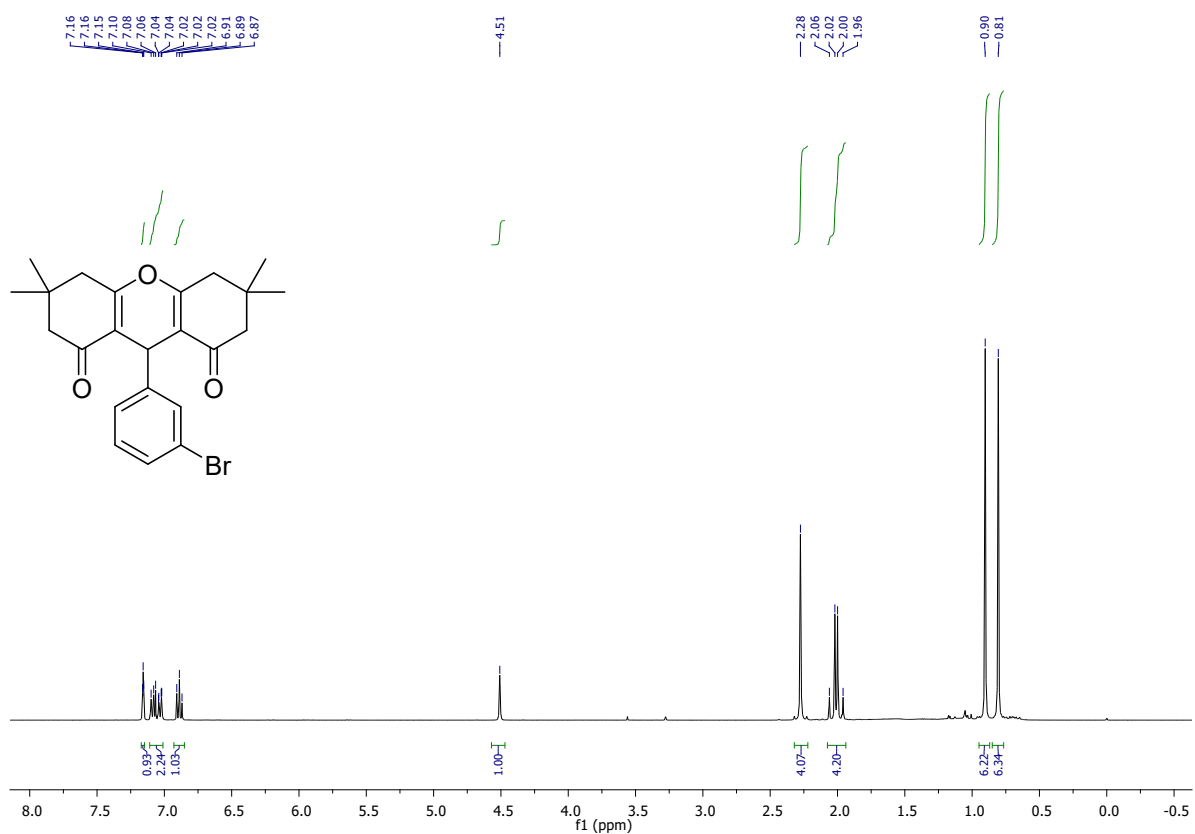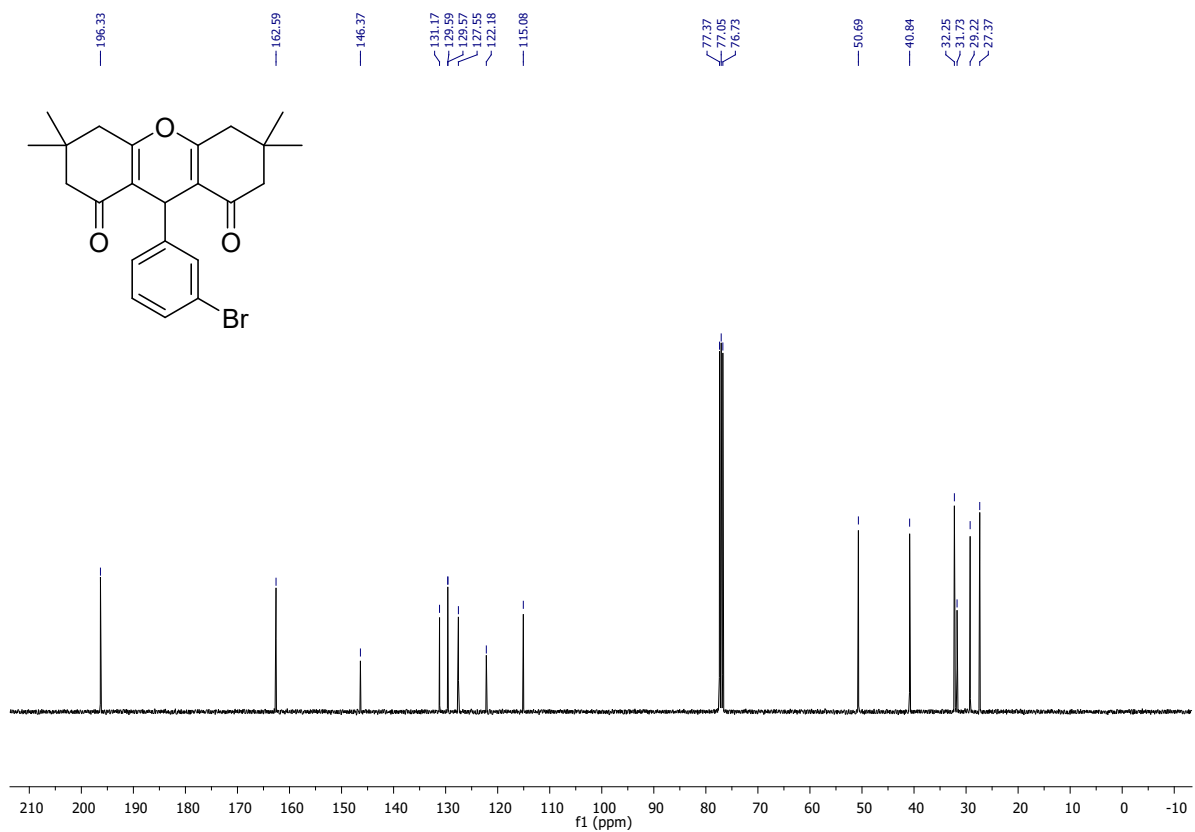

# $^1\text{H}$ and $^{13}\text{C}$ NMR of compound 14y

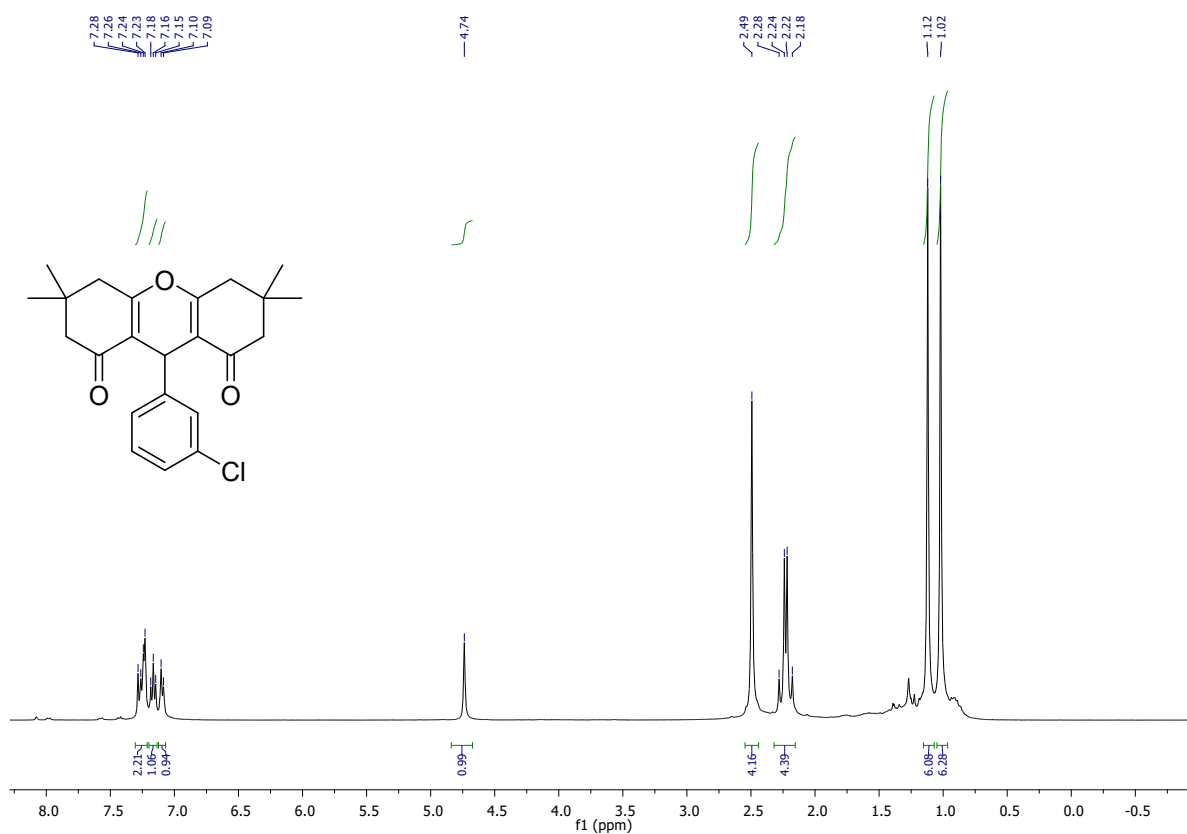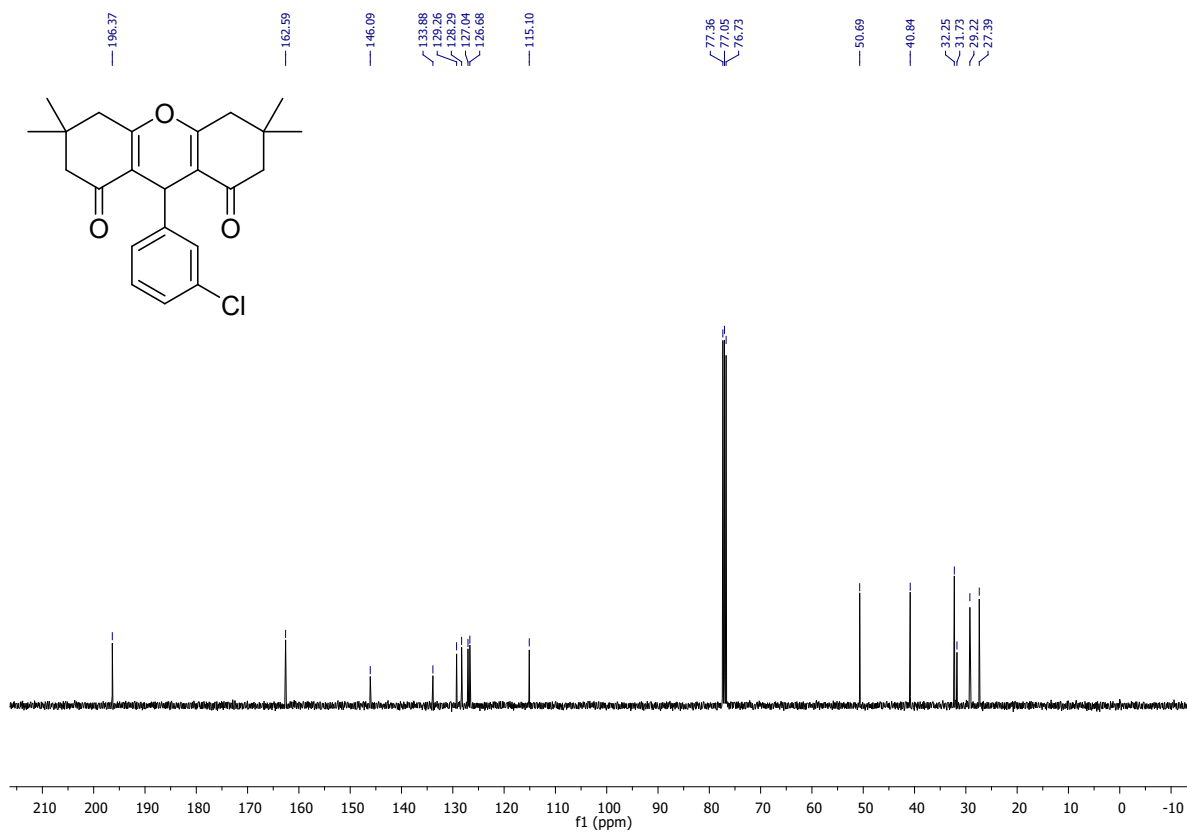

# HPLC Purity data of Compound 14c

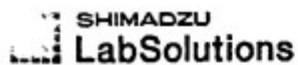

## Analysis Report

### <Sample Information>

Sample Name : BT-01-53  
Sample ID : BT-01-53  
Data Filename : 15.02.2023\_02.lcd  
Method Filename : 15-02-2023\_Isocratic-01.lcm  
Batch Filename : 15.02.2023.Lcb  
Vial # : 1-91  
Injection Volume : 1 uL  
Date Acquired : 2/15/2023 12:20:16 PM  
Date Processed : 2/15/2023 12:35:19 PM  
Sample Type : Unknown  
Acquired by : System Administrator  
Processed by : System Administrator

### <Chromatogram>

mAU

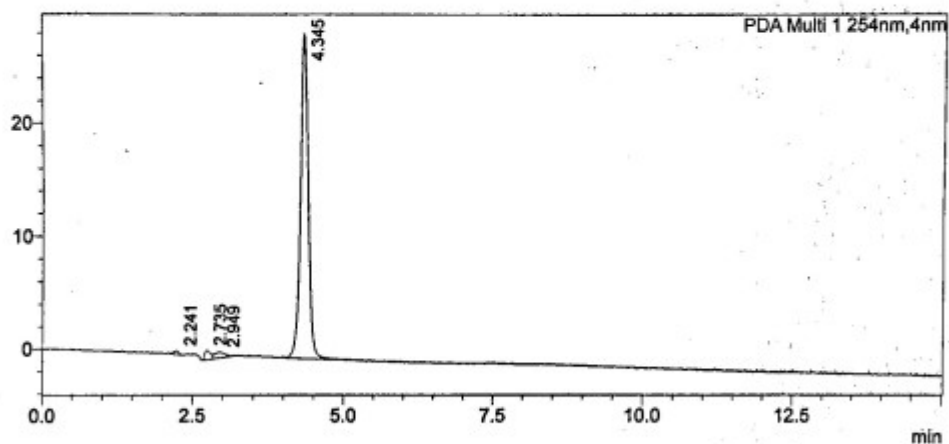

### <Peak Table>

PDA Ch1 254nm

| Peak# | Ret. Time | Name | Area   | Area%   |
|-------|-----------|------|--------|---------|
| 1     | 2.241     |      | 1675   | 0.618   |
| 2     | 2.735     |      | 5805   | 2.144   |
| 3     | 2.949     |      | 5995   | 2.214   |
| 4     | 4.345     |      | 257325 | 95.024  |
| Total |           |      | 270799 | 100.000 |

# HPLC Purity data of Compound 14r

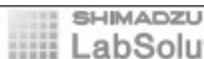

## Analysis Report

### <Sample Information>

Sample Name : BT 01 47  
Sample ID : BT 01 47  
Data Filename : 26-04-22AMIT008.lcd  
Method Filename : amit.lcm  
Batch Filename : amit.lcb  
Vial # : 1-42  
Injection Volume : 5 uL  
Date Acquired : 26-04-2022  
Sample Type : Unknown  
Acquired by : Amit Kumar

### <Chromatogram>

mAU

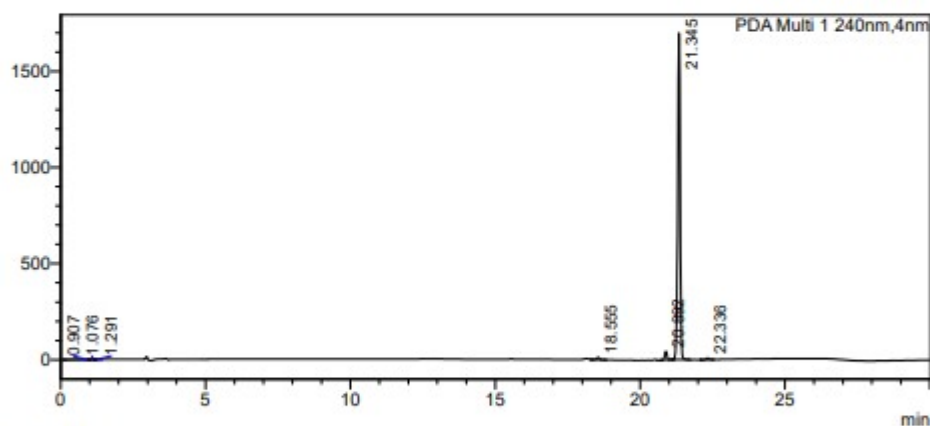

### <Peak Table>

PDA Ch1 240nm

| Ret. Time | Area     | Height  | Area%   |
|-----------|----------|---------|---------|
| 0.907     | 11576    | 333     | 0.113   |
| 1.076     | 2391     | 284     | 0.023   |
| 1.291     | 732      | 74      | 0.007   |
| 18.555    | 73893    | 12371   | 0.724   |
| 20.892    | 223588   | 44324   | 2.190   |
| 21.345    | 9843134  | 1698277 | 96.418  |
| 22.336    | 53507    | 8686    | 0.524   |
|           | 10208821 | 1764349 | 100.000 |
